# Supplementary material for: Lysyl oxidase-like 1 predicts the prognosis of patients with primary glioblastoma and promotes tumor invasion via EMT pathway
Source: PeerJ. 2024 Jul 5;12:e17579. doi: 10.7717/peerj.17579 (PMC11229686; doi:10.7717/peerj.17579)
Supplement: Supplemental Information 2 [file peerj-12-17579-s002.xlsx]

## Sheet: Sheet1
lox				loxl1				loxl2				loxl3				loxl4
Gene Symbol	Gene ID	PCC		Gene Symbol	Gene ID	PCC		Gene Symbol	Gene ID	PCC		Gene Symbol	Gene ID	PCC		Gene Symbol	Gene ID	PCC
IL36B	ENSG00000136696.10	0.84		AC020571.3	ENSG00000229056.2	0.94		COL6A3	ENSG00000163359.15	0.93		TRAM2	ENSG00000065308.4	0.73		RP11-38H17.1	ENSG00000254366.6	0.93
NDRG1	ENSG00000104419.14	0.7		ITGA11	ENSG00000137809.16	0.93		MXRA5Y	ENSG00000235649.2	0.89		H6PD	ENSG00000049239.12	0.7		RP11-66B24.4	ENSG00000259583.2	0.92
RP11-367F23.2	ENSG00000260454.1	0.69		CTA-215D11.4	ENSG00000232848.1	0.93		COL1A1	ENSG00000108821.13	0.88		PLOD1	ENSG00000083444.16	0.7		QRSL1P1	ENSG00000215833.3	0.92
FOSL2	ENSG00000075426.11	0.68		RP11-417E7.1	ENSG00000223485.1	0.92		BMP1	ENSG00000168487.17	0.87		FNDC3B	ENSG00000075420.12	0.69		SHISA2	ENSG00000180730.4	0.92
PTPRU	ENSG00000060656.19	0.67		COL7A1	ENSG00000114270.15	0.92		COL5A2	ENSG00000204262.11	0.86		ABL2	ENSG00000143322.19	0.69		EBF2	ENSG00000221818.8	0.91
CA12	ENSG00000074410.13	0.66		ROS1	ENSG00000047936.10	0.92		MXRA5	ENSG00000101825.7	0.86		EDEM1	ENSG00000134109.10	0.68		PCAT5	ENSG00000280719.1	0.91
SPINK1	ENSG00000164266.10	0.66		SPANXD	ENSG00000196406.4	0.92		COL3A1	ENSG00000168542.12	0.85		MYO1C	ENSG00000197879.14	0.68		LINC00377	ENSG00000229246.1	0.91
AKAP12	ENSG00000131016.16	0.65		RP11-314N14.1	ENSG00000250102.5	0.91		SNAI2	ENSG00000019549.8	0.85		COLGALT1	ENSG00000130309.10	0.68		GPC3	ENSG00000147257.13	0.91
SLC6A6	ENSG00000131389.16	0.64		IRX3	ENSG00000177508.11	0.91		EMILIN1	ENSG00000138080.13	0.85		CHSY1	ENSG00000131873.5	0.68		FZD8	ENSG00000177283.5	0.91
HIF1A-AS2	ENSG00000258667.1	0.64		COL5A1	ENSG00000130635.15	0.91		AP001476.2	ENSG00000224413.1	0.85		COL6A1	ENSG00000142156.14	0.68		FGF10-AS1	ENSG00000248464.1	0.9
DPYD	ENSG00000188641.12	0.64		AC093850.2	ENSG00000230838.1	0.91		PCOLCE	ENSG00000106333.12	0.84		ESYT2	ENSG00000117868.15	0.67		PKDCC	ENSG00000162878.12	0.9
GLIPR1	ENSG00000139278.9	0.64		SPANXA2	ENSG00000203926.4	0.9		LAMB1	ENSG00000091136.13	0.84		PTPN12	ENSG00000127947.15	0.66		TBX18	ENSG00000112837.16	0.9
ANGPTL4	ENSG00000167772.11	0.64		CXADRP2	ENSG00000258712.2	0.9		COL1A2	ENSG00000164692.17	0.84		LATS2	ENSG00000150457.8	0.66		SIX2	ENSG00000170577.7	0.9
MYADM	ENSG00000179820.15	0.64		AC112721.2	ENSG00000222032.1	0.9		DLX3	ENSG00000064195.7	0.83		ANTXR2	ENSG00000163297.16	0.65		DKKL1	ENSG00000104901.6	0.89
CEBPB	ENSG00000172216.5	0.64		RP11-308N19.1	ENSG00000234323.5	0.9		RFX8	ENSG00000196460.12	0.83		HK2P1	ENSG00000228612.2	0.65		RP11-99H20.1	ENSG00000254123.1	0.89
RP11-662I13.2	ENSG00000255921.1	0.63		RP11-574H6.1	ENSG00000261036.1	0.9		COL6A2	ENSG00000142173.14	0.82		ITGB1P1	ENSG00000269378.1	0.65		NYNRIN	ENSG00000205978.5	0.89
MROH9	ENSG00000117501.14	0.63		SPANXC	ENSG00000198573.6	0.89		AC093627.7	ENSG00000232325.4	0.82		LMNA	ENSG00000160789.19	0.65		RP11-14C22.3	ENSG00000230998.1	0.89
C1R	ENSG00000159403.15	0.63		SPANXA1	ENSG00000198021.6	0.89		FN1	ENSG00000115414.18	0.81		FURIN	ENSG00000140564.10	0.65		FNDC1	ENSG00000164694.16	0.89
CAST	ENSG00000153113.23	0.63		SPANXB1	ENSG00000227234.1	0.89		GLT8D2	ENSG00000120820.12	0.81		NFKB1	ENSG00000109320.11	0.65		GFRA1	ENSG00000151892.14	0.89
ERO1L	ENSG00000197930.12	0.63		ZCCHC5	ENSG00000179300.3	0.89		COL18A1	ENSG00000182871.14	0.81		P4HB	ENSG00000185624.14	0.65		RP11-263K4.3	ENSG00000257431.1	0.88
LINC00922	ENSG00000261742.5	0.63		RP11-221N13.4	ENSG00000256915.1	0.89		COL6A1	ENSG00000142156.14	0.8		SPTY2D1	ENSG00000179119.14	0.65		RP11-234G16.4	ENSG00000275327.1	0.88
AC019172.2	ENSG00000227363.1	0.62		RP11-61G24.1	ENSG00000250655.1	0.89		RP11-426C22.4	ENSG00000259807.1	0.8		MMP14	ENSG00000157227.12	0.65		RP11-810B23.1	ENSG00000227475.1	0.88
MMP19	ENSG00000123342.15	0.62		RP11-350D17.2	ENSG00000255427.1	0.89		OLFML2B	ENSG00000162745.10	0.78		NFKB2	ENSG00000077150.17	0.64		JUP	ENSG00000173801.16	0.88
ELL2	ENSG00000118985.14	0.62		RP11-317O24.1	ENSG00000249405.1	0.89		TRIM43	ENSG00000144015.4	0.78		ZDHHC5	ENSG00000156599.10	0.64		SFRP1	ENSG00000104332.11	0.87
CPD	ENSG00000108582.11	0.61		NTF6B	ENSG00000267685.2	0.89		ADGRA2	ENSG00000020181.17	0.78		COL6A2	ENSG00000142173.14	0.64		MYH8	ENSG00000133020.4	0.87
BCL3	ENSG00000069399.12	0.61		RP11-262K1.1	ENSG00000227016.2	0.89		RP11-550P17.5	ENSG00000228560.1	0.78		ERN1	ENSG00000178607.15	0.64		BICC1	ENSG00000122870.11	0.87
PYGL	ENSG00000100504.16	0.61		TET1P1	ENSG00000232204.1	0.89		LAMC1	ENSG00000135862.5	0.78		ITPRIPL2	ENSG00000205730.6	0.64		TRABD2B	ENSG00000269113.3	0.87
IL1RL1	ENSG00000115602.16	0.61		LINC01020	ENSG00000215231.7	0.89		MMP14	ENSG00000157227.12	0.78		MRC2	ENSG00000011028.13	0.64		CLCN5	ENSG00000171365.15	0.87
GBE1	ENSG00000114480.12	0.6		RP11-452K20.1	ENSG00000258570.1	0.89		FZD1	ENSG00000157240.3	0.78		PLXNA1	ENSG00000114554.11	0.64		RP11-543D5.2	ENSG00000223814.1	0.87
SLC2A3	ENSG00000059804.15	0.6		AC107016.2	ENSG00000281110.1	0.89		TBC1D8B	ENSG00000133138.19	0.77		P4HA1	ENSG00000122884.12	0.64		CYP26A1	ENSG00000095596.11	0.87
NRP1	ENSG00000099250.17	0.6		RP11-391J13.1	ENSG00000249411.1	0.89		DIRC1	ENSG00000174325.4	0.77		LAMC1	ENSG00000135862.5	0.64		RP11-513G11.3	ENSG00000238097.1	0.87
THBD	ENSG00000178726.6	0.6		RP11-19P22.5	ENSG00000265788.1	0.89		PRR33	ENSG00000184682.5	0.77		PLOD3	ENSG00000106397.11	0.63		PTGIS	ENSG00000124212.5	0.86
PROS1	ENSG00000184500.14	0.6		RP11-294C11.7	ENSG00000279639.2	0.89		TRIM43B	ENSG00000144010.8	0.77		LMAN1	ENSG00000074695.5	0.63		OCA2	ENSG00000104044.15	0.86
TREML2	ENSG00000112195.8	0.6		OR11K2P	ENSG00000258438.3	0.89		KIRREL	ENSG00000183853.17	0.77		KIRREL	ENSG00000183853.17	0.63		EBF3	ENSG00000108001.13	0.86
ATP13A3	ENSG00000133657.14	0.6		OR10A6	ENSG00000175393.3	0.89		COL5A1	ENSG00000130635.15	0.77		SEC24D	ENSG00000150961.14	0.63		VASH2	ENSG00000143494.15	0.86
FNDC3B	ENSG00000075420.12	0.6		RN7SKP32	ENSG00000222099.1	0.89		SSC5D	ENSG00000179954.14	0.76		FAM114A1	ENSG00000197712.11	0.63		SVILP1	ENSG00000234814.7	0.86
SUSD2	ENSG00000099994.10	0.6		RP11-272K23.3	ENSG00000257429.1	0.89		BGN	ENSG00000182492.15	0.76		MAP2K3	ENSG00000034152.18	0.62		COL13A1	ENSG00000197467.13	0.86
BHLHE40	ENSG00000134107.4	0.59		PNLIPP1	ENSG00000232091.1	0.89		RCN3	ENSG00000142552.7	0.76		PPP1R3B	ENSG00000173281.4	0.62		RP13-463N16.6	ENSG00000242147.1	0.86
PPP1R3B	ENSG00000173281.4	0.59		RP11-805L22.1	ENSG00000266448.1	0.89		P3H1	ENSG00000117385.15	0.76		BACE2	ENSG00000182240.15	0.62		RP11-1103G16.1	ENSG00000257636.6	0.86
CD300E	ENSG00000186407.6	0.59		DSCR10	ENSG00000233316.3	0.89		SERPINH1	ENSG00000149257.13	0.76		TGOLN2	ENSG00000152291.13	0.62		ABCA10	ENSG00000154263.17	0.86
PLAUR	ENSG00000011422.11	0.59		RN7SKP168	ENSG00000222842.1	0.89		ITGA5	ENSG00000161638.10	0.75		PRRC1	ENSG00000164244.20	0.62		HIC1	ENSG00000177374.12	0.86
SLC39A14	ENSG00000104635.13	0.58		RBM22P6	ENSG00000275643.1	0.89		CDC42EP5	ENSG00000167617.2	0.75		ANO1-AS2	ENSG00000254417.1	0.62		ISLR	ENSG00000129009.12	0.86
EPAS1	ENSG00000116016.13	0.58		OR10J2P	ENSG00000248642.1	0.89		ANPEP	ENSG00000166825.13	0.75		SLAIN2	ENSG00000109171.14	0.62		ADGRA2	ENSG00000020181.17	0.86
RP11-903H12.5	ENSG00000259171.1	0.58		RP11-369J21.11	ENSG00000229616.2	0.89		SH3PXD2A	ENSG00000107957.16	0.75		BET1L	ENSG00000177951.17	0.62		LINC00622	ENSG00000260941.1	0.86
LUCAT1	ENSG00000248323.5	0.58		RP11-666G4.2	ENSG00000230654.1	0.89		RP11-153F5.7	ENSG00000278185.1	0.75		SLC35C1	ENSG00000181830.8	0.61		AC011298.2	ENSG00000219159.4	0.86
ENTHD1	ENSG00000176177.9	0.58		OR9M1P	ENSG00000186124.3	0.89		RP11-479G22.8	ENSG00000273038.2	0.75		ANO1	ENSG00000131620.17	0.61		LMX1A	ENSG00000162761.14	0.85
TNFAIP3	ENSG00000118503.14	0.58		AC005777.3	ENSG00000267148.1	0.89		COL12A1	ENSG00000111799.20	0.75		UGGT1	ENSG00000136731.12	0.61		TBX3	ENSG00000135111.14	0.85
HRH2	ENSG00000113749.6	0.58		RNU1-105P	ENSG00000200340.1	0.89		SEC24D	ENSG00000150961.14	0.74		MYOF	ENSG00000138119.16	0.61		STK26	ENSG00000134602.15	0.85
WI2-87327B8.2	ENSG00000273812.1	0.58		RP11-685B24.1	ENSG00000279733.1	0.89		RP11-863P13.3	ENSG00000261327.4	0.74		MANBA	ENSG00000109323.8	0.61		AGTR2	ENSG00000180772.6	0.85
RP11-506N2.1	ENSG00000251339.5	0.58		LINC00208	ENSG00000170983.3	0.89		PDGFRB	ENSG00000113721.13	0.7		KDELC2	ENSG00000178202.12	0.61		RP11-796E10.1	ENSG00000270460.1	0.85
