# Supplementary material for: Lysyl oxidase-like 1 predicts the prognosis of patients with primary glioblastoma and promotes tumor invasion via EMT pathway
Source: PeerJ. 2024 Jul 5;12:e17579. doi: 10.7717/peerj.17579 (PMC11229686; doi:10.7717/peerj.17579)
Supplement: Supplemental Information 3 [file peerj-12-17579-s003.xlsx]

## Sheet: Supplementary File 3 (TCGA 330 
Sample,Histology,Recurrence,Subtype,subtype-c,CIMP_status,g-cimp,survival,status,IDH1_status,idh1,MGMT_status,Subtype_Verhaak_2010,Age,age,Therapy_Class,chemo,radio,Gender,gender,LOXL1_mRNA,loxl1,loxl1,RISK SCORE
TCGA.32.2615,GBM,Primary,Mesenchymal,2,G-CIMP,1,3.4,0,Mutant,1,Methylated,Proneural,40.6,0,"TMZ Chemoradiation, TMZ Chemo",1,1,Male,1,-6.6654,0,Low,
TCGA.14.0871,GBM,Primary,Proneural,3,G-CIMP,1,5.1,0,Mutant,1,Methylated,Proneural,45.4,0,"TMZ Chemoradiation, TMZ Chemo",1,1,Female,0,-6.479,0,Low,
TCGA.19.5951,GBM,Primary,Classical,1,NON G-CIMP,0,44,1,Wild-type,0,Methylated,Proneural,59.8,1,"TMZ Chemoradiation, TMZ Chemo",1,1,Female,0,-5.8882,0,Low,
TCGA.19.5952,GBM,Primary,Classical,1,NON G-CIMP,0,14.5,1,Wild-type,0,Unmethylated,Classical,34.3,0,"TMZ Chemoradiation, TMZ Chemo",1,1,Female,0,-5.5022,0,Low,
TCGA.19.2625,GBM,Primary,Classical,1,NON G-CIMP,0,9.5,1,Wild-type,0,Unmethylated,Proneural,75.5,1,"TMZ Chemoradiation, TMZ Chemo",1,1,Male,1,-5.3828,0,Low,
TCGA.32.4210,GBM,Primary,Proneural,3,NON G-CIMP,0,14.7,1,Wild-type,0,Unmethylated,Classical,86,1,"TMZ Chemoradiation, TMZ Chemo",1,1,Male,1,-5.3726,0,Low,
TCGA.76.4925,GBM,Primary,Proneural,3,G-CIMP,1,3.7,1,Mutant,1,Methylated,Proneural,39.1,0,"TMZ Chemoradiation, TMZ Chemo",1,1,Male,1,-5.2988,0,Low,
TCGA.14.0781,GBM,Primary,Mesenchymal,2,NON G-CIMP,0,0.2,0,Wild-type,0,Methylated,Proneural,77.5,1,Unspecified Radiation,0,1,Female,0,-5.2504,0,Low,
TCGA.06.0644,GBM,Primary,Mesenchymal,2,G-CIMP,1,6.7,1,Mutant,1,Methylated,Proneural,54.5,0,"TMZ Chemoradiation, TMZ Chemo",1,1,Male,1,-5.2054,0,Low,
TCGA.14.1794,GBM,Primary,Proneural,3,G-CIMP,1,19.8,1,Mutant,1,,Neural,31,0,Standard Radiation,0,1,Male,1,-5.1276,0,Low,
TCGA.32.2495,GBM,Primary,Classical,1,NON G-CIMP,0,14.9,1,Wild-type,0,Methylated,Neural,60.7,1,"TMZ Chemoradiation, TMZ Chemo",1,1,Female,0,-4.983,0,Low,
TCGA.08.0359,GBM,Primary,Proneural,3,G-CIMP,1,21.1,0,Mutant,1,Methylated,Proneural,25.2,0,"TMZ Chemoradiation, TMZ Chemo",1,1,Male,1,-4.9742,0,Low,
TCGA.06.0176,GBM,Primary,Mesenchymal,2,NON G-CIMP,0,21.3,1,Wild-type,0,Methylated,Classical,53.2,0,"TMZ Chemoradiation, TMZ Chemo",1,1,Female,0,-4.9196,0,Low,
TCGA.06.0148,GBM,Primary,Classical,1,NON G-CIMP,0,18.1,1,Wild-type,0,Unmethylated,Mesenchymal,48.5,0,"TMZ Chemoradiation, TMZ Chemo",1,1,Male,1,-4.8676,0,Low,
TCGA.12.5299,GBM,Primary,Classical,1,NON G-CIMP,0,15.4,1,Wild-type,0,Unmethylated,Classical,59.2,1,"TMZ Chemoradiation, TMZ Chemo",1,1,Male,1,-4.8314,0,Low,
TCGA.28.5216,GBM,Primary,Mesenchymal,2,NON G-CIMP,0,5.8,1,Wild-type,0,Unmethylated,Neural,64.1,1,"Standard Radiation, Alkylating Chemo",1,1,Male,1,-4.8012,0,Low,
TCGA.02.0027,GBM,Primary,Classical,1,NON G-CIMP,0,8.9,0,Wild-type,0,Methylated,Proneural,60,1,"TMZ Chemoradiation, TMZ Chemo",1,1,Male,1,-4.798,0,Low,
TCGA.41.3915,GBM,Primary,Mesenchymal,2,NON G-CIMP,0,46.9,1,Wild-type,0,,Classical,67,1,"Standard Radiation, TMZ Chemo",1,1,Male,1,-4.661,0,Low,
TCGA.06.2559,GBM,Primary,Proneural,3,NON G-CIMP,0,13.8,1,Wild-type,0,,Classical,65.8,1,"Nonstandard Radiation, TMZ Chemo",1,1,Male,1,-4.6322,0,Low,
TCGA.14.0812,GBM,Primary,Mesenchymal,2,G-CIMP,1,41,0,Mutant,1,Methylated,Proneural,23.9,0,Standard Radiation,0,1,Male,1,-4.63,0,Low,
TCGA.19.5959,GBM,Primary,Classical,1,G-CIMP,1,24.2,1,Mutant,1,Unmethylated,Proneural,60.9,1,"TMZ Chemoradiation, TMZ Chemo",1,1,Male,1,-4.5952,0,Low,
TCGA.06.0650,GBM,Primary,Mesenchymal,2,NON G-CIMP,0,24.2,1,Wild-type,0,,Proneural,61.7,1,Standard Radiation,0,1,Female,0,-4.5892,0,Low,
TCGA.28.1747,GBM,Primary,Classical,1,NON G-CIMP,0,3.8,0,Wild-type,0,Unmethylated,Proneural,38.5,0,"TMZ Chemoradiation, TMZ Chemo",1,1,Female,0,-4.5248,0,Low,
TCGA.27.1837,GBM,Primary,Classical,1,G-CIMP,1,26.1,0,Mutant,1,Methylated,Proneural,54.6,0,Standard Radiation,0,1,Male,1,-4.4974,0,Low,
TCGA.02.0086,GBM,Primary,Mesenchymal,2,NON G-CIMP,0,7.9,1,Wild-type,0,,Proneural,59.9,1,Standard Radiation,0,1,Male,1,-4.4786,0,Low,
TCGA.76.6282,GBM,Primary,Mesenchymal,2,NON G-CIMP,0,7.6,1,Wild-type,0,Unmethylated,Proneural,70.3,1,Standard Radiation,0,1,Male,1,-4.4622,0,Low,
TCGA.28.5220,GBM,Primary,Classical,1,G-CIMP,1,16.4,1,Mutant,1,Unmethylated,Proneural,52.8,0,Standard Radiation,0,1,Female,0,-4.3472,0,Low,
TCGA.26.5133,GBM,Primary,Proneural,3,NON G-CIMP,0,14.3,1,Wild-type,0,Unmethylated,Neural,64.1,1,"TMZ Chemoradiation, TMZ Chemo",1,1,Male,1,-4.301,0,Low,
TCGA.28.5219,GBM,Primary,Classical,1,G-CIMP,1,6.4,0,Mutant,1,Methylated,Proneural,36.2,0,Unspecified Radiation,0,1,Female,0,-4.2812,0,Low,
TCGA.06.0645,GBM,Primary,Mesenchymal,2,NON G-CIMP,0,15.7,1,Wild-type,0,Methylated,Neural,75.9,1,"TMZ Chemoradiation, TMZ Chemo",1,1,Female,0,-4.2558,0,Low,
TCGA.14.1455,GBM,Primary,Proneural,3,G-CIMP,1,31.5,0,Mutant,1,Methylated,Proneural,21.7,0,"TMZ Chemoradiation, TMZ Chemo",1,1,Female,0,-4.2104,0,Low,
TCGA.02.0048,GBM,Primary,Classical,1,NON G-CIMP,0,2.9,1,Wild-type,0,Unmethylated,Neural,79.3,1,Unspecified Radiation,0,1,Female,0,-4.1266,0,Low,
TCGA.08.0349,GBM,Primary,Classical,1,G-CIMP,1,115.9,1,Mutant,1,,Proneural,66.4,1,"Nonstandard Radiation, Alkylating Chemo",1,1,Male,1,-4.1142,0,Low,
TCGA.14.1823,GBM,Primary,Mesenchymal,2,NON G-CIMP,0,43.5,0,Wild-type,0,Unmethylated,Proneural,61.1,1,"Standard Radiation, TMZ Chemo",1,1,Female,0,-4.0986,0,Low,
TCGA.26.1442,GBM,Primary,Proneural,3,NON G-CIMP,0,7.4,1,Wild-type,0,,Neural,63.3,1,Nonstandard Radiation,0,1,Male,1,-4.057,0,Low,
TCGA.14.1827,GBM,Primary,Classical,1,NON G-CIMP,0,43.2,1,Wild-type,0,,Neural,24.2,0,"Standard Radiation, TMZ Chemo",1,1,Male,1,-3.985,0,Low,
TCGA.06.0155,GBM,Primary,Mesenchymal,2,NON G-CIMP,0,87.1,1,Wild-type,0,,Classical,50,0,"Standard Radiation, TMZ Chemo",1,1,Male,1,-3.985,0,Low,
TCGA.28.2513,GBM,Primary,Mesenchymal,2,NON G-CIMP,0,17.9,1,Wild-type,0,Methylated,Mesenchymal,58.5,1,"TMZ Chemoradiation, TMZ Chemo",1,1,Female,0,-3.9808,0,Low,
TCGA.06.0749,GBM,Primary,Classical,1,G-CIMP,1,17.8,1,Mutant,1,Methylated,Proneural,31,0,"TMZ Chemoradiation, TMZ Chemo",1,1,Male,1,-3.9714,0,Low,
TCGA.76.4926,GBM,Primary,Mesenchymal,2,G-CIMP,1,88.1,1,Wild-type,0,,Neural,39,0,"TMZ Chemoradiation, TMZ Chemo",1,1,Male,1,-3.9708,0,Low,
TCGA.14.1034,GBM,Primary,Classical,1,NON G-CIMP,0,13,1,Wild-type,0,,Proneural,49.5,0,"TMZ Chemoradiation, TMZ Chemo",1,1,Male,1,-3.9288,0,Low,
TCGA.06.5418,GBM,Primary,Mesenchymal,2,NON G-CIMP,0,12.5,1,Wild-type,0,Unmethylated,Proneural,75.3,1,Standard Radiation,0,1,Female,0,-3.8808,0,Low,
TCGA.06.0185,GBM,Primary,Classical,1,NON G-CIMP,0,4.4,1,Wild-type,0,Methylated,Neural,65,1,"Nonstandard Radiation, TMZ Chemo",1,1,Male,1,-3.8662,0,Low,
TCGA.28.1757,GBM,Primary,Classical,1,NON G-CIMP,0,3.9,1,Wild-type,0,Methylated,Proneural,85.2,1,Unspecified Radiation,0,1,Male,1,-3.8318,0,Low,
TCGA.14.1829,GBM,Primary,Mesenchymal,2,NON G-CIMP,0,6.7,0,Wild-type,0,Methylated,Neural,63.8,1,"TMZ Chemoradiation, TMZ Chemo",1,1,Female,0,-3.8258,0,Low,
TCGA.41.3392,GBM,Primary,Classical,1,NON G-CIMP,0,12.7,1,Wild-type,0,Methylated,Neural,77.4,1,"TMZ Chemoradiation, TMZ Chemo",1,1,Male,1,-3.747,0,Low,
TCGA.12.1602,GBM,Primary,Proneural,3,NON G-CIMP,0,6,1,Wild-type,0,Methylated,Proneural,66.1,1,"TMZ Chemoradiation, TMZ Chemo",1,1,Female,0,-3.7194,0,Low,
TCGA.27.1835,GBM,Primary,Classical,1,NON G-CIMP,0,16.8,1,Wild-type,0,Unmethylated,Proneural,61.5,1,"TMZ Chemoradiation, TMZ Chemo",1,1,Male,1,-3.689,0,Low,
TCGA.06.6390,GBM,Primary,Classical,1,NON G-CIMP,0,13.1,1,Wild-type,0,,Neural,65.9,1,"Nonstandard Radiation, TMZ Chemo",1,1,Male,1,-3.6588,0,Low,
TCGA.12.1089,GBM,Primary,Classical,1,NON G-CIMP,0,29,1,Wild-type,0,Methylated,Mesenchymal,49.8,0,Standard Radiation,0,1,Female,0,-3.6352,0,Low,
TCGA.06.1800,GBM,Primary,Mesenchymal,2,NON G-CIMP,0,11.8,1,Wild-type,0,Unmethylated,Proneural,56.2,1,"Standard Radiation, TMZ Chemo",1,1,Female,0,-3.6312,0,Low,
TCGA.14.0787,GBM,Primary,Classical,1,NON G-CIMP,0,26.8,1,Wild-type,0,Unmethylated,Neural,79.1,1,"TMZ Chemoradiation, TMZ Chemo",1,1,Female,0,-3.617,0,Low,
TCGA.41.2575,GBM,Primary,Proneural,3,G-CIMP,1,22.7,1,Mutant,1,Methylated,Proneural,66.3,1,"Standard Radiation, TMZ Chemo",1,1,Male,1,-3.6166,0,Low,
TCGA.08.0351,GBM,Primary,Proneural,3,NON G-CIMP,0,7.2,0,Wild-type,0,Unmethylated,Neural,57.3,1,"TMZ Chemoradiation, TMZ Chemo",1,1,Male,1,-3.5766,0,Low,
TCGA.06.0881,GBM,Primary,Mesenchymal,2,NON G-CIMP,0,0.5,1,Wild-type,0,,Neural,55.1,1,Unspecified Radiation,0,1,Female,0,-3.5754,0,Low,
TCGA.12.3646,GBM,Primary,Proneural,3,NON G-CIMP,0,22.2,1,Wild-type,0,Methylated,Proneural,62.6,1,"Standard Radiation, TMZ Chemo",1,1,Female,0,-3.5386,0,Low,
TCGA.12.1600,GBM,Primary,Classical,1,NON G-CIMP,0,9.4,1,Wild-type,0,Unmethylated,Neural,68.9,1,"Standard Radiation, TMZ Chemo",1,1,Male,1,-3.5254,0,Low,
TCGA.12.1598,GBM,Primary,Proneural,3,NON G-CIMP,0,26,1,Wild-type,0,Methylated,Neural,60.8,1,"Standard Radiation, TMZ Chemo",1,1,Male,1,-3.4812,0,Low,
TCGA.06.2561,GBM,Primary,Classical,1,NON G-CIMP,0,5.8,1,Wild-type,0,,Proneural,61,1,"TMZ Chemoradiation, TMZ Chemo",1,1,Male,1,-3.4656,0,Low,
TCGA.19.2619,GBM,Primary,Classical,1,G-CIMP,1,14.9,0,Wild-type,0,Unmethylated,Proneural,59,1,"TMZ Chemoradiation, TMZ Chemo",1,1,Male,1,-3.4596,0,Low,
TCGA.06.0208,GBM,Primary,Classical,1,G-CIMP,1,33.9,0,Mutant,1,Unmethylated,Proneural,28.9,0,"TMZ Chemoradiation, TMZ Chemo",1,1,Female,0,-3.439,0,Low,
TCGA.02.0064,GBM,Primary,Mesenchymal,2,NON G-CIMP,0,11.3,1,Wild-type,0,Unmethylated,Mesenchymal,71.1,1,"Nonstandard Radiation, TMZ Chemo",1,1,Male,1,-3.431,0,Low,
TCGA.02.0085,GBM,Primary,Mesenchymal,2,NON G-CIMP,0,15.9,1,Wild-type,0,Unmethylated,Mesenchymal,62.7,1,"Nonstandard Radiation, TMZ Chemo",1,1,Male,1,-3.426,0,Low,
TCGA.06.0147,GBM,Primary,Mesenchymal,2,NON G-CIMP,0,5.9,1,Wild-type,0,Methylated,Neural,51.5,0,Alkylating Chemo,1,0,Male,1,-3.4214,0,Low,
TCGA.32.2494,GBM,Primary,Mesenchymal,2,NON G-CIMP,0,26.9,1,Wild-type,0,Methylated,Classical,61.5,1,"TMZ Chemoradiation, TMZ Chemo",1,1,Female,0,-3.4206,0,Low,
TCGA.06.0211,GBM,Primary,Classical,1,NON G-CIMP,0,4.7,1,Wild-type,0,Unmethylated,Proneural,50.2,0,Standard Radiation,0,1,Male,1,-3.4174,0,Low,
TCGA.06.2567,GBM,Primary,Classical,1,G-CIMP,1,38.8,1,Mutant,1,Methylated,Mesenchymal,38.6,0,"Standard Radiation, TMZ Chemo",1,1,Female,0,-3.4004,0,Low,
TCGA.19.2631,GBM,Primary,Classical,1,G-CIMP,1,15.3,0,Mutant,1,Methylated,Proneural,43.7,0,"TMZ Chemoradiation, TMZ Chemo",1,1,Male,1,-3.3316,0,Low,
TCGA.02.0046,GBM,Primary,Proneural,3,NON G-CIMP,0,59.8,1,Wild-type,0,Methylated,Neural,47.8,0,"TMZ Chemoradiation, TMZ Chemo",1,1,Female,0,-3.3222,0,Low,
TCGA.08.0350,GBM,Primary,Proneural,3,NON G-CIMP,0,40.5,1,Wild-type,0,Methylated,Neural,56.3,1,"TMZ Chemoradiation, TMZ Chemo",1,1,Male,1,-3.3214,0,Low,
TCGA.32.1986,GBM,Primary,Mesenchymal,2,NON G-CIMP,0,73.8,0,Wild-type,0,,Neural,54.5,0,"TMZ Chemoradiation, TMZ Chemo",1,1,Male,1,-3.311,0,Low,
TCGA.32.1982,GBM,Primary,Classical,1,NON G-CIMP,0,20.7,1,Wild-type,0,Methylated,Proneural,19,0,"TMZ Chemoradiation, TMZ Chemo",1,1,Female,0,-3.3102,0,Low,
TCGA.06.0878,GBM,Primary,Mesenchymal,2,NON G-CIMP,0,69.9,1,Wild-type,0,,Mesenchymal,63.8,1,"Standard Radiation, TMZ Chemo",1,1,Male,1,-3.2652,0,Low,
TCGA.02.0009,GBM,Primary,Classical,1,G-CIMP,1,65,1,Wild-type,0,,Proneural,29.3,0,"TMZ Chemoradiation, TMZ Chemo",1,1,Female,0,-3.2596,0,Low,
TCGA.28.1753,GBM,Primary,Mesenchymal,2,G-CIMP,1,33.7,1,Mutant,1,Methylated,Proneural,30.9,0,"TMZ Chemoradiation, TMZ Chemo",1,1,Male,1,-3.2494,0,Low,
TCGA.06.0213,GBM,Primary,Mesenchymal,2,NON G-CIMP,0,14.9,1,Wild-type,0,,Neural,74.7,1,"Standard Radiation, TMZ Chemo",1,1,Female,0,-3.2344,0,Low,
TCGA.06.0216,GBM,Primary,Proneural,3,NON G-CIMP,0,2.5,1,Wild-type,0,Methylated,Classical,44.6,0,"Nonstandard Radiation, TMZ Chemo",1,1,Male,1,-3.2156,0,Low,
TCGA.14.1825,GBM,Primary,Proneural,3,NON G-CIMP,0,11.8,1,Wild-type,0,,Classical,48,0,"Standard Radiation, Alkylating Chemo",1,1,Male,1,-3.1836,0,Low,
TCGA.14.1451,GBM,Primary,Proneural,3,NON G-CIMP,0,31.3,0,Wild-type,0,Unmethylated,Mesenchymal,72.5,1,"Standard Radiation, TMZ Chemo",1,1,Male,1,-3.1834,0,Low,
TCGA.28.1752,GBM,Primary,Classical,1,NON G-CIMP,0,6.8,1,Wild-type,0,Methylated,Proneural,58.8,1,"TMZ Chemoradiation, TMZ Chemo",1,1,Male,1,-3.172,0,Low,
TCGA.06.0154,GBM,Primary,Mesenchymal,2,NON G-CIMP,0,10.7,1,Wild-type,0,Unmethylated,Classical,48.6,0,Standard Radiation,0,1,Female,0,-3.1718,0,Low,
TCGA.27.2521,GBM,Primary,Proneural,3,NON G-CIMP,0,17.9,1,Wild-type,0,,Classical,52.6,0,"Standard Radiation, TMZ Chemo",1,1,Female,0,-3.1698,0,Low,
TCGA.28.1751,GBM,Primary,Mesenchymal,2,NON G-CIMP,0,12.9,1,Wild-type,0,Methylated,Mesenchymal,58.5,1,"TMZ Chemoradiation, TMZ Chemo",1,1,Male,1,-3.1678,0,Low,
TCGA.15.0742,GBM,Primary,Classical,1,G-CIMP,1,65.3,1,Wild-type,0,,Proneural,40.6,0,"Standard Radiation, TMZ Chemo",1,1,Male,1,-3.1576,0,Low,
TCGA.32.2632,GBM,Primary,Classical,1,NON G-CIMP,0,1,1,Wild-type,0,Unmethylated,Neural,88.6,1,Unspecified Radiation,0,1,Male,1,-3.1458,0,Low,
TCGA.19.1386,GBM,Primary,Classical,1,NON G-CIMP,0,15,1,Wild-type,0,,Neural,66.2,1,Standard Radiation,0,1,Male,1,-3.1204,0,Low,
TCGA.19.2624,GBM,Primary,Proneural,3,NON G-CIMP,0,1.1,1,Wild-type,0,Unmethylated,Mesenchymal,76.6,1,Unspecified Radiation,0,1,Male,1,-3.108,0,Low,
TCGA.19.1789,GBM,Primary,Classical,1,NON G-CIMP,0,2.7,1,Wild-type,0,,Neural,50.8,0,Nonstandard Radiation,0,1,Male,1,-3.1056,0,Low,
TCGA.19.2621,GBM,Primary,Classical,1,NON G-CIMP,0,19,1,Wild-type,0,Methylated,Mesenchymal,78,1,Unspecified Radiation,0,1,Female,0,-3.103,0,Low,
TCGA.06.0241,GBM,Primary,Proneural,3,NON G-CIMP,0,5.3,0,Wild-type,0,Unmethylated,Classical,45.8,0,"Standard Radiation, TMZ Chemo",1,1,Male,1,-3.096,0,Low,
TCGA.12.3644,GBM,Primary,Proneural,3,NON G-CIMP,0,10.6,1,Wild-type,0,Unmethylated,Neural,62.8,1,"Standard Radiation, Alkylating Chemo",1,1,Male,1,-3.0744,0,Low,
TCGA.06.0648,GBM,Primary,Proneural,3,NON G-CIMP,0,127.6,1,Wild-type,0,Unmethylated,Mesenchymal,53.9,0,"Standard Radiation, Alkylating Chemo",1,1,Female,0,-3.0606,0,Low,
TCGA.02.0060,GBM,Primary,Proneural,3,NON G-CIMP,0,3.4,1,Wild-type,0,,Proneural,59.5,1,Nonstandard Radiation,0,1,Female,0,-3.0348,0,Low,
TCGA.12.0657,GBM,Primary,Classical,1,NON G-CIMP,0,4.1,1,Wild-type,0,Unmethylated,Classical,76.5,1,Unspecified Radiation,0,1,Female,0,-3.0338,0,Low,
TCGA.02.2483,GBM,Primary,Proneural,3,NON G-CIMP,0,25.4,1,Wild-type,0,Methylated,Proneural,63.1,1,Unspecified Radiation,0,1,Female,0,-2.9976,0,Low,
TCGA.02.2486,GBM,Primary,Mesenchymal,2,NON G-CIMP,0,44.6,1,Wild-type,0,,Neural,71.4,1,"Standard Radiation, TMZ Chemo",1,1,Male,1,-2.9948,0,Low,
TCGA.06.5858,GBM,Primary,Classical,1,NON G-CIMP,0,8.4,1,Wild-type,0,,Proneural,58.4,1,"TMZ Chemoradiation, TMZ Chemo",1,1,Male,1,-2.9872,0,Low,
TCGA.28.5207,GBM,Primary,Mesenchymal,2,NON G-CIMP,0,23.1,1,Wild-type,0,Unmethylated,Proneural,39.4,0,"TMZ Chemoradiation, TMZ Chemo",1,1,Male,1,-2.9518,0,Low,
TCGA.06.0238,GBM,Primary,Proneural,3,NON G-CIMP,0,10.2,1,Wild-type,0,Unmethylated,Proneural,68.2,1,"TMZ Chemoradiation, TMZ Chemo",1,1,Female,0,-2.9472,0,Low,
TCGA.19.5947,GBM,Primary,Mesenchymal,2,G-CIMP,1,24.6,1,Mutant,1,,Proneural,27.4,0,"Standard Radiation, TMZ Chemo",1,1,Male,1,-2.9418,0,Low,
TCGA.08.0345,GBM,Primary,Proneural,3,NON G-CIMP,0,0.4,0,Wild-type,0,Unmethylated,Mesenchymal,24.4,0,Unspecified Radiation,0,1,Female,0,-2.9398,0,Low,
TCGA.06.0128,GBM,Primary,Proneural,3,NON G-CIMP,0,36.9,1,Wild-type,0,Methylated,Proneural,52.6,0,"Standard Radiation, TMZ Chemo",1,1,Female,0,-2.9376,0,Low,
TCGA.32.2491,GBM,Primary,Mesenchymal,2,NON G-CIMP,0,0.7,1,Wild-type,0,,Neural,67,1,Unspecified Radiation,0,1,Male,1,-2.9334,0,Low,
TCGA.32.4211,GBM,Primary,Proneural,3,NON G-CIMP,0,24.2,1,Wild-type,0,Unmethylated,Classical,67.3,1,"Standard Radiation, TMZ Chemo",1,1,Female,0,-2.8854,0,Low,
TCGA.06.0137,GBM,Primary,Classical,1,NON G-CIMP,0,25.4,1,Wild-type,0,,Neural,49.6,0,"Standard Radiation, TMZ Chemo",1,1,Male,1,-2.8676,0,Low,
TCGA.12.0619,GBM,Primary,Mesenchymal,2,NON G-CIMP,0,30.6,0,Wild-type,0,Methylated,Classical,72.9,1,"TMZ Chemoradiation, TMZ Chemo",1,1,Female,0,-2.8336,0,Low,
TCGA.28.6450,GBM,Primary,Classical,1,NON G-CIMP,0,48.7,1,Wild-type,0,,Proneural,66,1,Standard Radiation,0,1,Female,0,-2.8322,0,Low,
TCGA.02.0011,GBM,Primary,Proneural,3,NON G-CIMP,0,10.6,1,Wild-type,0,Methylated,Classical,61.5,1,Nonstandard Radiation,0,1,Female,0,-2.8256,0,Low,
TCGA.12.3648,GBM,Primary,Classical,1,NON G-CIMP,0,22.7,1,Wild-type,0,,Classical,62.1,1,"TMZ Chemoradiation, TMZ Chemo",1,1,Male,1,-2.8036,0,Low,
TCGA.02.0033,GBM,Primary,Mesenchymal,2,NON G-CIMP,0,22.7,0,Wild-type,0,Methylated,Classical,47.2,0,"Nonstandard Radiation, TMZ Chemo",1,1,Female,0,-2.7902,0,Low,
TCGA.02.2485,GBM,Primary,Classical,1,NON G-CIMP,0,7.2,0,Wild-type,0,Unmethylated,Classical,64.5,1,Standard Radiation,0,1,Female,0,-2.7884,0,Low,
TCGA.14.1453,GBM,Primary,Classical,1,NON G-CIMP,0,9.8,1,Wild-type,0,,Proneural,78,1,"Standard Radiation, TMZ Chemo",1,1,Male,1,-2.7876,0,Low,
TCGA.06.5412,GBM,Primary,Mesenchymal,2,NON G-CIMP,0,23.1,1,Wild-type,0,Methylated,Classical,50.9,0,"Standard Radiation, TMZ Chemo",1,1,Female,0,-2.7834,0,Low,
TCGA.02.0079,GBM,Primary,Mesenchymal,2,NON G-CIMP,0,4.5,1,Wild-type,0,,Neural,72.7,1,Unspecified Radiation,0,1,Female,0,-2.7722,0,Low,
TCGA.02.0069,GBM,Primary,Proneural,3,NON G-CIMP,0,1,1,Wild-type,0,Unmethylated,Proneural,59.2,1,Nonstandard Radiation,0,1,Male,1,-2.7678,0,Low,
TCGA.14.4157,GBM,Primary,Proneural,3,NON G-CIMP,0,16.1,1,Wild-type,0,Methylated,Classical,63.1,1,"Standard Radiation, TMZ Chemo",1,1,Male,1,-2.758,0,Low,
TCGA.27.2518,GBM,Primary,Classical,1,NON G-CIMP,0,14.9,1,Wild-type,0,Unmethylated,Neural,72.5,1,"TMZ Chemoradiation, TMZ Chemo",1,1,Male,1,-2.7392,0,Low,
TCGA.06.0130,GBM,Primary,Mesenchymal,2,NON G-CIMP,0,16.5,1,Wild-type,0,Methylated,Proneural,67.9,1,"TMZ Chemoradiation, TMZ Chemo",1,1,Male,1,-2.7358,0,Low,
TCGA.12.0773,GBM,Primary,Mesenchymal,2,NON G-CIMP,0,12.6,1,Wild-type,0,Unmethylated,Neural,56.8,1,"TMZ Chemoradiation, TMZ Chemo",1,1,Male,1,-2.709,0,Low,
TCGA.08.0355,GBM,Primary,Classical,1,NON G-CIMP,0,9,0,Wild-type,0,Unmethylated,Classical,61.7,1,"TMZ Chemoradiation, TMZ Chemo",1,1,Male,1,-2.6942,0,Low,
TCGA.02.2466,GBM,Primary,Proneural,3,NON G-CIMP,0,0.1,1,Wild-type,0,,Classical,69.6,1,Unspecified Radiation,0,1,Male,1,-2.689,0,Low,
TCGA.06.0197,GBM,Primary,Mesenchymal,2,NON G-CIMP,0,13.6,1,Wild-type,0,,Neural,75.9,1,"TMZ Chemoradiation, TMZ Chemo",1,1,Female,0,-2.683,0,Low,
TCGA.26.5134,GBM,Primary,Proneural,3,NON G-CIMP,0,10.9,1,Wild-type,0,Unmethylated,Proneural,46.9,0,"TMZ Chemoradiation, TMZ Chemo",1,1,Male,1,-2.682,0,Low,
TCGA.06.0649,GBM,Primary,Mesenchymal,2,NON G-CIMP,0,28.9,1,Wild-type,0,Unmethylated,Mesenchymal,75,1,Standard Radiation,0,1,Female,0,-2.6818,0,Low,
TCGA.12.1093,GBM,Primary,Mesenchymal,2,NON G-CIMP,0,8.6,0,Wild-type,0,Unmethylated,Classical,60.8,1,"TMZ Chemoradiation, TMZ Chemo",1,1,Male,1,-2.6756,0,Low,
TCGA.08.0386,GBM,Primary,Classical,1,NON G-CIMP,0,9.2,1,Wild-type,0,Unmethylated,Classical,70.7,1,"Nonstandard Radiation, TMZ Chemo",1,1,Female,0,-2.6628,0,Low,
TCGA.02.0052,GBM,Primary,Proneural,3,NON G-CIMP,0,13.3,1,Wild-type,0,Unmethylated,Classical,67.1,1,"TMZ Chemoradiation, TMZ Chemo",1,1,Male,1,-2.6524,0,Low,
TCGA.32.1977,GBM,Primary,Mesenchymal,2,NON G-CIMP,0,6,0,Wild-type,0,Methylated,Proneural,81.8,1,"TMZ Chemoradiation, TMZ Chemo",1,1,Male,1,-2.6496,0,Low,
TCGA.08.0353,GBM,Primary,Proneural,3,NON G-CIMP,0,19.2,1,Wild-type,0,Methylated,Proneural,66.1,1,"TMZ Chemoradiation, TMZ Chemo",1,1,Male,1,-2.6438,0,Low,
TCGA.28.1749,GBM,Primary,Classical,1,NON G-CIMP,0,12.2,1,Wild-type,0,,Proneural,64,1,"TMZ Chemoradiation, TMZ Chemo",1,1,Male,1,-2.6214,0,Low,
TCGA.27.2524,GBM,Primary,Mesenchymal,2,NON G-CIMP,0,17.6,1,Wild-type,0,Unmethylated,Mesenchymal,53.4,0,"TMZ Chemoradiation, TMZ Chemo",1,1,Female,0,-2.6036,0,Low,
TCGA.06.0201,GBM,Primary,Mesenchymal,2,NON G-CIMP,0,9.4,0,Wild-type,0,Methylated,Classical,74.5,1,"TMZ Chemoradiation, TMZ Chemo",1,1,Male,1,-2.5992,0,Low,
TCGA.12.1599,GBM,Primary,Classical,1,NON G-CIMP,0,0.9,1,Wild-type,0,Methylated,Proneural,61.8,1,Alkylating Chemo,1,0,Male,1,-2.5882,0,Low,
TCGA.28.5218,GBM,Primary,Mesenchymal,2,NON G-CIMP,0,14.2,1,Wild-type,0,,Proneural,53.4,0,"Standard Radiation, TMZ Chemo",1,1,Male,1,-2.5814,0,Low,
TCGA.19.1388,GBM,Primary,Classical,1,NON G-CIMP,0,10.5,0,Wild-type,0,Unmethylated,Classical,67.4,1,"Standard Radiation, TMZ Chemo",1,1,Male,1,-2.573,0,Low,
TCGA.08.0373,GBM,Primary,Mesenchymal,2,NON G-CIMP,0,6.9,1,Wild-type,0,Unmethylated,Classical,86.6,1,Unspecified Radiation,0,1,Male,1,-2.5408,0,Low,
TCGA.16.0861,GBM,Primary,Classical,1,NON G-CIMP,0,13.3,1,Wild-type,0,,Proneural,46.6,0,"TMZ Chemoradiation, TMZ Chemo",1,1,Male,1,-2.5382,0,Low,
TCGA.16.1460,GBM,Primary,Proneural,3,NON G-CIMP,0,2.1,1,Wild-type,0,,Neural,73.4,1,Unspecified Radiation,0,1,Female,0,-2.5348,0,Low,
TCGA.02.0054,GBM,Primary,Mesenchymal,2,NON G-CIMP,0,19.7,1,Wild-type,0,,Mesenchymal,59.6,1,"TMZ Chemoradiation, TMZ Chemo",1,1,Female,0,-2.515,0,Low,
TCGA.19.1790,GBM,Primary,Mesenchymal,2,NON G-CIMP,0,3.2,1,Wild-type,0,Methylated,Neural,65.9,1,Alkylating Chemo,1,0,Male,1,-2.4962,0,Low,
TCGA.06.0157,GBM,Primary,Classical,1,NON G-CIMP,0,24.2,1,Wild-type,0,,Neural,43.1,0,"Standard Radiation, TMZ Chemo",1,1,Male,1,-2.4956,0,Low,
TCGA.32.1976,GBM,Primary,Proneural,3,NON G-CIMP,0,4.8,1,Wild-type,0,Methylated,Proneural,76.7,1,"Nonstandard Radiation, TMZ Chemo",1,1,Male,1,-2.4826,0,Low,
TCGA.76.4929,GBM,Primary,Proneural,3,NON G-CIMP,0,0.1,0,Wild-type,0,Unmethylated,Neural,82.3,1,Unspecified Radiation,0,1,Female,0,-2.4784,0,Low,
TCGA.12.0775,GBM,Primary,Mesenchymal,2,NON G-CIMP,0,2,1,Wild-type,0,Methylated,Neural,59.6,1,"TMZ Chemoradiation, TMZ Chemo",1,1,Male,1,-2.4626,0,Low,
TCGA.28.5208,GBM,Primary,Mesenchymal,2,NON G-CIMP,0,4.9,1,Wild-type,0,Methylated,Neural,70.3,1,"TMZ Chemoradiation, TMZ Chemo",1,1,Male,1,-2.4544,0,Low,
TCGA.12.1088,GBM,Primary,Mesenchymal,2,NON G-CIMP,0,37.6,1,Wild-type,0,,Classical,49.7,0,"TMZ Chemoradiation, TMZ Chemo",1,1,Male,1,-2.4392,0,Low,
TCGA.27.1832,GBM,Primary,Mesenchymal,2,NON G-CIMP,0,14.7,1,Wild-type,0,,Proneural,36.8,0,"TMZ Chemoradiation, TMZ Chemo",1,1,Female,0,-2.4064,0,Low,
TCGA.06.1801,GBM,Primary,Proneural,3,NON G-CIMP,0,0.4,1,Wild-type,0,,Mesenchymal,51.1,0,Unspecified Radiation,0,1,Female,0,-2.4048,0,Low,
TCGA.41.2573,GBM,Primary,Proneural,3,NON G-CIMP,0,47.6,1,Wild-type,0,Methylated,Classical,63.9,1,"TMZ Chemoradiation, TMZ Chemo",1,1,Female,0,-2.4036,0,Low,
TCGA.27.2528,GBM,Primary,Classical,1,NON G-CIMP,0,1.1,1,Wild-type,0,Unmethylated,Classical,69.3,1,Unspecified Radiation,0,1,Male,1,-2.4028,0,Low,
TCGA.28.2514,GBM,Primary,Classical,1,NON G-CIMP,0,13.6,0,Wild-type,0,Unmethylated,Mesenchymal,52.7,0,"TMZ Chemoradiation, TMZ Chemo",1,1,Male,1,-2.3996,0,Low,
TCGA.19.1791,GBM,Primary,Classical,1,NON G-CIMP,0,10.8,1,Wild-type,0,,Classical,73.5,1,"Standard Radiation, Alkylating Chemo",1,1,Male,1,-2.3942,0,Low,
TCGA.26.5132,GBM,Primary,Classical,1,NON G-CIMP,0,20.3,1,Wild-type,0,Unmethylated,Mesenchymal,64,1,"TMZ Chemoradiation, TMZ Chemo",1,1,Male,1,-2.3924,0,Low,
TCGA.06.0744,GBM,Primary,Classical,1,NON G-CIMP,0,5.8,1,Wild-type,0,,Proneural,57.3,1,Standard Radiation,0,1,Male,1,-2.3806,0,Low,
TCGA.26.5136,GBM,Primary,Mesenchymal,2,NON G-CIMP,0,15.2,1,Wild-type,0,Unmethylated,Neural,76.2,1,TMZ Chemo,1,0,Male,1,-2.3796,0,Low,
TCGA.41.4097,GBM,Primary,Mesenchymal,2,NON G-CIMP,0,7,1,Wild-type,0,Methylated,Classical,74.5,1,Standard Radiation,0,1,Female,0,-2.3722,0,Low,
TCGA.08.0357,GBM,Primary,Classical,1,NON G-CIMP,0,10.8,1,Wild-type,0,Unmethylated,Classical,73.1,1,"TMZ Chemoradiation, TMZ Chemo",1,1,Male,1,-2.3478,0,Low,
TCGA.26.1799,GBM,Primary,Classical,1,NON G-CIMP,0,2.3,1,Wild-type,0,Methylated,Classical,53.8,0,Unspecified Radiation,0,1,Female,0,-2.342,0,Low,
TCGA.76.6191,GBM,Primary,Proneural,3,NON G-CIMP,0,5.4,1,Wild-type,0,Unmethylated,Neural,69.6,1,Unspecified Radiation,0,1,Female,0,-2.3042,0,Low,
TCGA.06.0188,GBM,Primary,Proneural,3,NON G-CIMP,0,8.9,1,Wild-type,0,Methylated,Neural,57.2,1,"Standard Radiation, TMZ Chemo",1,1,Male,1,-2.283,0,Low,
TCGA.06.5413,GBM,Primary,Mesenchymal,2,NON G-CIMP,0,15.7,1,Wild-type,0,Methylated,Neural,52.7,0,"TMZ Chemoradiation, TMZ Chemo",1,1,Male,1,-2.2728,0,Low,
TCGA.76.4927,GBM,Primary,Classical,1,NON G-CIMP,0,0.8,1,Wild-type,0,Unmethylated,Proneural,89.3,1,TMZ Chemo,1,0,Male,1,-2.2674,0,Low,
TCGA.41.3393,GBM,Primary,Mesenchymal,2,NON G-CIMP,0,11.5,1,Wild-type,0,Unmethylated,Mesenchymal,59.4,1,"Standard Radiation, TMZ Chemo",1,1,Female,0,-2.2648,0,Low,
TCGA.06.0875,GBM,Primary,Proneural,3,NON G-CIMP,0,6,0,Wild-type,0,Unmethylated,Classical,50.5,0,"Nonstandard Radiation, TMZ Chemo",1,1,Male,1,-2.2578,0,Low,
TCGA.12.0822,GBM,Primary,Mesenchymal,2,NON G-CIMP,0,9.7,0,Wild-type,0,Methylated,Classical,55.2,1,"TMZ Chemoradiation, TMZ Chemo",1,1,Female,0,-2.2568,0,Low,
TCGA.06.0138,GBM,Primary,Mesenchymal,2,NON G-CIMP,0,19.1,0,Wild-type,0,Unmethylated,Classical,55.7,1,"TMZ Chemoradiation, TMZ Chemo",1,1,Male,1,-2.2494,1,High,
TCGA.08.0348,GBM,Primary,Proneural,3,NON G-CIMP,0,4,1,Wild-type,0,,Classical,67.1,1,Standard Radiation,0,1,Male,1,-2.2406,1,High,
TCGA.14.0790,GBM,Primary,Classical,1,NON G-CIMP,0,34.9,1,Wild-type,0,,Mesenchymal,60,1,"TMZ Chemoradiation, TMZ Chemo",1,1,Male,1,-2.2404,1,High,
TCGA.41.2572,GBM,Primary,Classical,1,NON G-CIMP,0,12.3,1,Wild-type,0,,Mesenchymal,68,1,Nonstandard Radiation,0,1,Male,1,-2.2398,1,High,
TCGA.19.2620,GBM,Primary,Classical,1,NON G-CIMP,0,7.5,0,Wild-type,0,Methylated,Mesenchymal,65.3,1,"TMZ Chemoradiation, TMZ Chemo",1,1,Male,1,-2.2108,1,High,
TCGA.08.0389,GBM,Primary,Classical,1,NON G-CIMP,0,8.3,0,Wild-type,0,Unmethylated,Mesenchymal,40.6,0,"TMZ Chemoradiation, TMZ Chemo",1,1,Female,0,-2.2076,1,High,
TCGA.08.0380,GBM,Primary,Classical,1,NON G-CIMP,0,17.8,1,Wild-type,0,Methylated,Mesenchymal,51.3,0,"Standard Radiation, TMZ Chemo",1,1,Female,0,-2.2032,1,High,
TCGA.06.0750,GBM,Primary,Mesenchymal,2,NON G-CIMP,0,4.8,0,Wild-type,0,Methylated,Mesenchymal,77.3,1,"Standard Radiation, TMZ Chemo",1,1,Female,0,-2.2,1,High,
TCGA.06.0156,GBM,Primary,Proneural,3,NON G-CIMP,0,25.7,1,Wild-type,0,Methylated,Neural,47.7,0,"TMZ Chemoradiation, TMZ Chemo",1,1,Female,0,-2.196,1,High,
TCGA.76.6285,GBM,Primary,Proneural,3,NON G-CIMP,0,10.4,1,Wild-type,0,,Mesenchymal,57.7,1,"TMZ Chemoradiation, TMZ Chemo",1,1,Male,1,-2.165,1,High,
TCGA.02.0023,GBM,Primary,Classical,1,NON G-CIMP,0,6.9,1,Wild-type,0,Methylated,Proneural,61.4,1,Standard Radiation,0,1,Male,1,-2.1528,1,High,
TCGA.19.1385,GBM,Primary,Mesenchymal,2,NON G-CIMP,0,2.5,0,Wild-type,0,Methylated,Mesenchymal,66.7,1,"Nonstandard Radiation, TMZ Chemo",1,1,Female,0,-2.1176,1,High,
TCGA.06.0152,GBM,Primary,Classical,1,NON G-CIMP,0,30.1,1,Wild-type,0,Methylated,Proneural,33,0,"TMZ Chemoradiation, TMZ Chemo",1,1,Female,0,-2.0962,1,High,
TCGA.06.0646,GBM,Primary,Proneural,3,NON G-CIMP,0,5.6,1,Wild-type,0,,Mesenchymal,66,1,Unspecified Radiation,0,1,Female,0,-2.0936,1,High,
TCGA.14.0813,GBM,Primary,Proneural,3,NON G-CIMP,0,14.7,1,Wild-type,0,Unmethylated,Proneural,78.7,1,Standard Radiation,0,1,Male,1,-2.072,1,High,
TCGA.08.0347,GBM,Primary,Proneural,3,NON G-CIMP,0,22.3,1,Wild-type,0,,Classical,50.3,0,"TMZ Chemoradiation, TMZ Chemo",1,1,Male,1,-2.0672,1,High,
TCGA.06.0173,GBM,Primary,Classical,1,NON G-CIMP,0,2.7,1,Wild-type,0,Unmethylated,Mesenchymal,75.5,1,Unspecified Radiation,0,1,Female,0,-2.0562,1,High,
TCGA.02.2470,GBM,Primary,Mesenchymal,2,NON G-CIMP,0,25.2,1,Wild-type,0,Methylated,Classical,67.5,1,"TMZ Chemoradiation, TMZ Chemo",1,1,Male,1,-2.0558,1,High,
TCGA.19.1786,GBM,Primary,Classical,1,NON G-CIMP,0,8.5,0,Wild-type,0,Methylated,Neural,42.6,0,"TMZ Chemoradiation, TMZ Chemo",1,1,Female,0,-2.0552,1,High,
TCGA.06.0877,GBM,Primary,Classical,1,NON G-CIMP,0,28.7,0,Wild-type,0,Methylated,Proneural,31.9,0,"TMZ Chemoradiation, TMZ Chemo",1,1,Female,0,-2.039,1,High,
TCGA.19.5955,GBM,Primary,Mesenchymal,2,NON G-CIMP,0,1.1,1,Wild-type,0,Methylated,Mesenchymal,78.7,1,Unspecified Radiation,0,1,Female,0,-2.0236,1,High,
TCGA.12.0656,GBM,Primary,Classical,1,NON G-CIMP,0,24.8,1,Wild-type,0,Unmethylated,Neural,52.4,0,"TMZ Chemoradiation, TMZ Chemo",1,1,Male,1,-2.0218,1,High,
TCGA.06.0221,GBM,Primary,Proneural,3,NON G-CIMP,0,9.8,1,Wild-type,0,,Neural,46.4,0,"TMZ Chemoradiation, TMZ Chemo",1,1,Male,1,-2.0058,1,High,
TCGA.32.1970,GBM,Primary,Classical,1,NON G-CIMP,0,27.2,1,Wild-type,0,,Classical,69.3,1,"Standard Radiation, TMZ Chemo",1,1,Male,1,-1.9958,1,High,
TCGA.06.5415,GBM,Primary,Classical,1,NON G-CIMP,0,13.9,1,Wild-type,0,Unmethylated,Classical,63.8,1,"TMZ Chemoradiation, TMZ Chemo",1,1,Male,1,-1.9764,1,High,
TCGA.26.5139,GBM,Primary,Mesenchymal,2,NON G-CIMP,0,26.7,1,Wild-type,0,,Classical,74.2,1,"Standard Radiation, TMZ Chemo",1,1,Male,1,-1.9718,1,High,
TCGA.28.1746,GBM,Primary,Proneural,3,NON G-CIMP,0,18,1,Wild-type,0,,Neural,74.1,1,"TMZ Chemoradiation, TMZ Chemo",1,1,Male,1,-1.9586,1,High,
TCGA.14.2554,GBM,Primary,Classical,1,NON G-CIMP,0,24.6,1,Wild-type,0,,Classical,30.4,0,"TMZ Chemoradiation, TMZ Chemo",1,1,Female,0,-1.9374,1,High,
TCGA.16.0846,GBM,Primary,Proneural,3,NON G-CIMP,0,3.2,1,Wild-type,0,,Proneural,80.2,1,Unspecified Radiation,0,1,Male,1,-1.923,1,High,
TCGA.06.0745,GBM,Primary,Proneural,3,NON G-CIMP,0,21.9,1,Wild-type,0,Unmethylated,Proneural,48.5,0,"TMZ Chemoradiation, TMZ Chemo",1,1,Female,0,-1.9186,1,High,
TCGA.06.0214,GBM,Primary,Classical,1,NON G-CIMP,0,94.8,1,Wild-type,0,,Classical,48.9,0,"Standard Radiation, TMZ Chemo",1,1,Female,0,-1.9108,1,High,
TCGA.76.4934,GBM,Primary,Proneural,3,NON G-CIMP,0,22.8,0,Wild-type,0,Methylated,Proneural,82,1,"TMZ Chemoradiation, TMZ Chemo",1,1,Male,1,-1.9082,1,High,
TCGA.06.2564,GBM,Primary,Classical,1,NON G-CIMP,0,20.1,1,Wild-type,0,,Classical,38.3,0,"TMZ Chemoradiation, TMZ Chemo",1,1,Female,0,-1.8938,1,High,
TCGA.32.5222,GBM,Primary,Proneural,3,NON G-CIMP,0,1.7,1,Wild-type,0,,Proneural,71.1,1,Nonstandard Radiation,0,1,Female,0,-1.8928,1,High,
TCGA.02.0034,GBM,Primary,Mesenchymal,2,NON G-CIMP,0,13.9,1,Wild-type,0,,Mesenchymal,54.8,0,Standard Radiation,0,1,Male,1,-1.8816,1,High,
TCGA.28.5214,GBM,Primary,Mesenchymal,2,NON G-CIMP,0,18.5,1,Wild-type,0,Unmethylated,Classical,40.7,0,"Standard Radiation, TMZ Chemo",1,1,Male,1,-1.8774,1,High,
TCGA.06.0122,GBM,Primary,Mesenchymal,2,NON G-CIMP,0,4.7,1,Wild-type,0,Methylated,Neural,76,1,Alkylating Chemo,1,0,Female,0,-1.8686,1,High,
TCGA.08.0344,GBM,Primary,Proneural,3,G-CIMP,1,10.4,0,Mutant,1,Methylated,Proneural,34.7,0,"Standard Radiation, TMZ Chemo",1,1,Male,1,-1.8614,1,High,
TCGA.06.2565,GBM,Primary,Classical,1,NON G-CIMP,0,26.4,1,Wild-type,0,,Classical,69.6,1,Standard Radiation,0,1,Male,1,-1.847,1,High,
TCGA.06.0143,GBM,Primary,Mesenchymal,2,NON G-CIMP,0,3.2,1,Wild-type,0,,Proneural,54.3,0,Nonstandard Radiation,0,1,Male,1,-1.845,1,High,
TCGA.02.0104,GBM,Primary,Proneural,3,NON G-CIMP,0,10.3,1,Wild-type,0,Unmethylated,Mesenchymal,62.8,1,"TMZ Chemoradiation, TMZ Chemo",1,1,Male,1,-1.8326,1,High,
TCGA.06.0132,GBM,Primary,Mesenchymal,2,NON G-CIMP,0,3.2,1,Wild-type,0,Unmethylated,Classical,56,1,"TMZ Chemoradiation, TMZ Chemo",1,1,Female,0,-1.8306,1,High,
TCGA.27.1830,GBM,Primary,Mesenchymal,2,NON G-CIMP,0,23.4,1,Wild-type,0,Unmethylated,Mesenchymal,53.4,0,"Nonstandard Radiation, TMZ Chemo",1,1,Male,1,-1.816,1,High,
TCGA.08.0360,GBM,Primary,Mesenchymal,2,NON G-CIMP,0,11.8,1,Wild-type,0,Methylated,Mesenchymal,49,0,"TMZ Chemoradiation, TMZ Chemo",1,1,Male,1,-1.8104,1,High,
TCGA.27.1833,GBM,Primary,Classical,1,NON G-CIMP,0,17.9,1,Wild-type,0,Methylated,Mesenchymal,52.2,0,"TMZ Chemoradiation, TMZ Chemo",1,1,Male,1,-1.8074,1,High,
TCGA.06.0192,GBM,Primary,Mesenchymal,2,NON G-CIMP,0,12.6,1,Wild-type,0,Unmethylated,Neural,49.5,0,"TMZ Chemoradiation, TMZ Chemo",1,1,Male,1,-1.7632,1,High,
TCGA.26.1439,GBM,Primary,Classical,1,NON G-CIMP,0,4.5,0,Wild-type,0,Unmethylated,Classical,68.3,1,"TMZ Chemoradiation, TMZ Chemo",1,1,Female,0,-1.736,1,High,
TCGA.14.0817,GBM,Primary,Mesenchymal,2,NON G-CIMP,0,4,1,Wild-type,0,Unmethylated,Proneural,75.7,1,"TMZ Chemoradiation, TMZ Chemo",1,1,Male,1,-1.736,1,High,
TCGA.08.0245,GBM,Primary,Proneural,3,NON G-CIMP,0,17.5,1,Wild-type,0,Unmethylated,Neural,52.3,0,Nonstandard Radiation,0,1,Female,0,-1.733,1,High,
TCGA.06.0141,GBM,Primary,Mesenchymal,2,NON G-CIMP,0,16,1,Wild-type,0,Unmethylated,Mesenchymal,66.5,1,"TMZ Chemoradiation, TMZ Chemo",1,1,Female,0,-1.7292,1,High,
TCGA.16.0849,GBM,Primary,Proneural,3,NON G-CIMP,0,8.8,1,Wild-type,0,Methylated,Mesenchymal,45.9,0,"TMZ Chemoradiation, TMZ Chemo",1,1,Female,0,-1.725,1,High,
TCGA.06.1084,GBM,Primary,Mesenchymal,2,NON G-CIMP,0,15.4,1,Wild-type,0,,Mesenchymal,55.6,1,"Standard Radiation, TMZ Chemo",1,1,Male,1,-1.717,1,High,
TCGA.19.5954,GBM,Primary,Classical,1,NON G-CIMP,0,31.1,1,Wild-type,0,,Classical,60,1,"TMZ Chemoradiation, TMZ Chemo",1,1,Female,0,-1.684,1,High,
TCGA.14.1795,GBM,Primary,Mesenchymal,2,NON G-CIMP,0,6,1,Wild-type,0,Unmethylated,Neural,23.1,0,"TMZ Chemoradiation, TMZ Chemo",1,1,Female,0,-1.6786,1,High,
TCGA.02.0038,GBM,Primary,Classical,1,NON G-CIMP,0,0.9,1,Wild-type,0,,Mesenchymal,43.9,0,Unspecified Radiation,0,1,Male,1,-1.6702,1,High,
TCGA.06.0939,GBM,Primary,Mesenchymal,2,NON G-CIMP,0,11,1,Wild-type,0,Methylated,Mesenchymal,62.1,1,"Nonstandard Radiation, TMZ Chemo",1,1,Female,0,-1.6518,1,High,
TCGA.06.0876,GBM,Primary,Proneural,3,NON G-CIMP,0,47.9,1,Wild-type,0,Methylated,Proneural,50.5,0,"Standard Radiation, TMZ Chemo",1,1,Female,0,-1.6446,1,High,
TCGA.76.4931,GBM,Primary,Classical,1,NON G-CIMP,0,14,1,Wild-type,0,Methylated,Classical,36.6,0,"Standard Radiation, TMZ Chemo",1,1,Male,1,-1.6436,1,High,
TCGA.06.2569,GBM,Primary,Mesenchymal,2,NON G-CIMP,0,5.5,0,Wild-type,0,Unmethylated,Proneural,74.2,1,Standard Radiation,0,1,Male,1,-1.6238,1,High,
TCGA.14.1037,GBM,Primary,Mesenchymal,2,NON G-CIMP,0,0.2,1,Wild-type,0,Unmethylated,Proneural,51.7,0,Unspecified Radiation,0,1,Male,1,-1.6236,1,High,
TCGA.06.5408,GBM,Primary,Classical,1,NON G-CIMP,0,9.1,1,Wild-type,0,Unmethylated,Classical,51.1,0,"TMZ Chemoradiation, TMZ Chemo",1,1,Male,1,-1.6088,1,High,
TCGA.76.4932,GBM,Primary,Proneural,3,NON G-CIMP,0,40.4,1,Wild-type,0,Methylated,Classical,52.4,0,"Standard Radiation, TMZ Chemo",1,1,Male,1,-1.608,1,High,
TCGA.12.0688,GBM,Primary,Classical,1,NON G-CIMP,0,5.8,1,Wild-type,0,,Mesenchymal,56,1,Unspecified Radiation,0,1,Female,0,-1.6028,1,High,
TCGA.26.5135,GBM,Primary,Proneural,3,NON G-CIMP,0,10.1,1,Wild-type,0,Unmethylated,Classical,76.2,1,Standard Radiation,0,1,Male,1,-1.5986,1,High,
TCGA.28.1750,GBM,Primary,Mesenchymal,2,NON G-CIMP,0,21.7,1,Wild-type,0,Methylated,Mesenchymal,58.6,1,"TMZ Chemoradiation, TMZ Chemo",1,1,Male,1,-1.5886,1,High,
TCGA.06.0133,GBM,Primary,Classical,1,NON G-CIMP,0,3.3,1,Wild-type,0,Unmethylated,Mesenchymal,68.8,1,"TMZ Chemoradiation, TMZ Chemo",1,1,Male,1,-1.58,1,High,
TCGA.28.5204,GBM,Primary,Proneural,3,NON G-CIMP,0,3.2,1,Wild-type,0,Methylated,Classical,69.2,1,"Standard Radiation, TMZ Chemo",1,1,Female,0,-1.571,1,High,
TCGA.32.2638,GBM,Primary,Classical,1,NON G-CIMP,0,8.9,1,Wild-type,0,Methylated,Proneural,72.5,1,Unspecified Radiation,0,1,Female,0,-1.5708,1,High,
TCGA.27.1834,GBM,Primary,Proneural,3,NON G-CIMP,0,9.2,0,Wild-type,0,Unmethylated,Classical,73.3,1,"TMZ Chemoradiation, TMZ Chemo",1,1,Male,1,-1.553,1,High,
TCGA.06.0125,GBM,Primary,Classical,1,NON G-CIMP,0,15.8,1,Wild-type,0,Methylated,Classical,62.6,1,"TMZ Chemoradiation, TMZ Chemo",1,1,Male,1,-1.5412,1,High,
TCGA.76.6192,GBM,Primary,Proneural,3,NON G-CIMP,0,14.9,1,Wild-type,0,,Mesenchymal,53.3,0,"TMZ Chemoradiation, TMZ Chemo",1,1,Male,1,-1.539,1,High,
TCGA.02.0074,GBM,Primary,Proneural,3,NON G-CIMP,0,15,1,Wild-type,0,Unmethylated,Classical,59.9,1,"TMZ Chemoradiation, TMZ Chemo",1,1,Female,0,-1.5314,1,High,
TCGA.14.0789,GBM,Primary,Mesenchymal,2,NON G-CIMP,0,16.6,1,Wild-type,0,Unmethylated,Neural,66.9,1,"TMZ Chemoradiation, TMZ Chemo",1,1,Male,1,-1.5312,1,High,
TCGA.06.5411,GBM,Primary,Proneural,3,NON G-CIMP,0,15.4,0,Wild-type,0,Unmethylated,Classical,53.4,0,"TMZ Chemoradiation, TMZ Chemo",1,1,Male,1,-1.5106,1,High,
TCGA.87.5896,GBM,Primary,Classical,1,NON G-CIMP,0,4.4,1,Wild-type,0,Unmethylated,Mesenchymal,81.9,1,"TMZ Chemoradiation, TMZ Chemo",1,1,Female,0,-1.5096,1,High,
TCGA.08.0375,GBM,Primary,Classical,1,NON G-CIMP,0,6.5,1,Wild-type,0,Methylated,Mesenchymal,44.4,0,"TMZ Chemoradiation, TMZ Chemo",1,1,Female,0,-1.5066,1,High,
TCGA.12.3651,GBM,Primary,Proneural,3,NON G-CIMP,0,20.4,1,Wild-type,0,Methylated,Mesenchymal,67.3,1,"Unspecified Radiation, TMZ Chemo",1,1,Male,1,-1.4874,1,High,
TCGA.06.0171,GBM,Primary,Proneural,3,NON G-CIMP,0,11.9,1,Wild-type,0,Unmethylated,Mesenchymal,40.3,0,"Standard Radiation, TMZ Chemo",1,1,Male,1,-1.4742,1,High,
TCGA.76.6193,GBM,Primary,Mesenchymal,2,NON G-CIMP,0,5.5,1,Wild-type,0,Unmethylated,Classical,53.2,0,Unspecified Radiation,0,1,Male,1,-1.4256,1,High,
TCGA.06.0169,GBM,Primary,Mesenchymal,2,NON G-CIMP,0,1.6,0,Wild-type,0,Unmethylated,Mesenchymal,65.1,1,Unspecified Radiation,0,1,Female,0,-1.41,1,High,
TCGA.12.3649,GBM,Primary,Classical,1,NON G-CIMP,0,26.4,1,Wild-type,0,,Classical,57.9,1,"TMZ Chemoradiation, TMZ Chemo",1,1,Male,1,-1.408,1,High,
TCGA.28.5213,GBM,Primary,Mesenchymal,2,NON G-CIMP,0,1.2,0,Wild-type,0,Unmethylated,Mesenchymal,53,0,Nonstandard Radiation,0,1,Male,1,-1.374,1,High,
TCGA.06.0174,GBM,Primary,Proneural,3,NON G-CIMP,0,37.8,1,Wild-type,0,,Proneural,31.8,0,"Standard Radiation, TMZ Chemo",1,1,Female,0,-1.361,1,High,
TCGA.76.4935,GBM,Primary,Proneural,3,NON G-CIMP,0,8.4,1,Wild-type,0,,Neural,52.3,0,Nonstandard Radiation,0,1,Female,0,-1.3528,1,High,
TCGA.12.1597,GBM,Primary,Proneural,3,NON G-CIMP,0,5.8,1,Wild-type,0,,Proneural,51.8,0,"Standard Radiation, Alkylating Chemo",1,1,Male,1,-1.3404,1,High,
TCGA.06.6389,GBM,Primary,Proneural,3,NON G-CIMP,0,27.2,1,Wild-type,0,,Mesenchymal,58,1,"TMZ Chemoradiation, TMZ Chemo",1,1,Male,1,-1.3372,1,High,
TCGA.32.4719,GBM,Primary,Classical,1,NON G-CIMP,0,2,1,Wild-type,0,Methylated,Proneural,66.7,1,Alkylating Chemo,1,0,Male,1,-1.3334,1,High,
TCGA.12.3652,GBM,Primary,Classical,1,NON G-CIMP,0,7.4,1,Wild-type,0,,Mesenchymal,72.8,1,Standard Radiation,0,1,Female,0,-1.3256,1,High,
TCGA.27.2526,GBM,Primary,Classical,1,NON G-CIMP,0,3.6,1,Wild-type,0,,Classical,75.3,1,TMZ Chemo,1,0,Female,0,-1.323,1,High,
TCGA.06.0126,GBM,Primary,Classical,1,NON G-CIMP,0,14.4,1,Wild-type,0,Methylated,Mesenchymal,81.1,1,Nonstandard Radiation,0,1,Male,1,-1.3068,1,High,
TCGA.02.0016,GBM,Primary,Classical,1,NON G-CIMP,0,4.2,1,Wild-type,0,,Classical,57.4,1,"TMZ Chemoradiation, TMZ Chemo",1,1,Female,0,-1.3016,1,High,
TCGA.27.1831,GBM,Primary,Classical,1,NON G-CIMP,0,7.3,0,Wild-type,0,Unmethylated,Mesenchymal,69.6,1,"TMZ Chemoradiation, TMZ Chemo",1,1,Female,0,-1.2844,1,High,
TCGA.06.0139,GBM,Primary,Mesenchymal,2,NON G-CIMP,0,23.9,1,Wild-type,0,Methylated,Mesenchymal,54.5,0,"Standard Radiation, TMZ Chemo",1,1,Male,1,-1.2346,1,High,
TCGA.15.1444,GBM,Primary,Proneural,3,NON G-CIMP,0,15.4,1,Wild-type,0,,Mesenchymal,76.4,1,Standard Radiation,0,1,Male,1,-1.2244,1,High,
TCGA.27.2519,GBM,Primary,Mesenchymal,2,NON G-CIMP,0,25.1,0,Wild-type,0,,Classical,71,1,"TMZ Chemoradiation, TMZ Chemo",1,1,Male,1,-1.1698,1,High,
TCGA.27.2527,GBM,Primary,Mesenchymal,2,NON G-CIMP,0,12.2,1,Wild-type,0,Methylated,Classical,33.9,0,"TMZ Chemoradiation, TMZ Chemo",1,1,Female,0,-1.162,1,High,
TCGA.02.0026,GBM,Primary,Proneural,3,NON G-CIMP,0,1.6,1,Wild-type,0,Unmethylated,Classical,52.7,0,"TMZ Chemoradiation, TMZ Chemo",1,1,Female,0,-1.1514,1,High,
TCGA.32.4213,GBM,Primary,Mesenchymal,2,NON G-CIMP,0,16.6,1,Wild-type,0,Methylated,Classical,59,1,"TMZ Chemoradiation, TMZ Chemo",1,1,Male,1,-1.1206,1,High,
TCGA.32.1980,GBM,Primary,Proneural,3,NON G-CIMP,0,1.4,1,Wild-type,0,Methylated,Proneural,78.2,1,Unspecified Radiation,0,1,Male,1,-1.1142,1,High,
TCGA.06.0145,GBM,Primary,Classical,1,NON G-CIMP,0,20.6,1,Wild-type,0,Methylated,Mesenchymal,75.2,1,"TMZ Chemoradiation, TMZ Chemo",1,1,Male,1,-1.104,1,High,
TCGA.12.5301,GBM,Primary,Proneural,3,NON G-CIMP,0,4.3,0,Wild-type,0,Unmethylated,Classical,65.1,1,Standard Radiation,0,1,Male,1,-1.066,1,High,
TCGA.12.0826,GBM,Primary,Classical,1,NON G-CIMP,0,6.2,1,Wild-type,0,Unmethylated,Mesenchymal,84.8,1,Unspecified Radiation,0,1,Female,0,-1.0634,1,High,
TCGA.14.0786,GBM,Primary,Classical,1,NON G-CIMP,0,12.2,1,Wild-type,0,,Classical,51.9,0,Standard Radiation,0,1,Female,0,-1.0514,1,High,
TCGA.06.5856,GBM,Primary,Classical,1,NON G-CIMP,0,1.3,1,Wild-type,0,,Mesenchymal,79.7,1,Unspecified Radiation,0,1,Male,1,-1.0266,1,High,
TCGA.14.0865,GBM,Primary,Proneural,3,NON G-CIMP,0,2.2,1,Wild-type,0,Methylated,Classical,69.3,1,Unspecified Radiation,0,1,Male,1,-1.0258,1,High,
TCGA.12.1092,GBM,Primary,Mesenchymal,2,NON G-CIMP,0,46.2,0,Wild-type,0,Methylated,Classical,72.2,1,"Standard Radiation, TMZ Chemo",1,1,Female,0,-1.005,1,High,
TCGA.02.0015,GBM,Primary,Mesenchymal,2,NON G-CIMP,0,25.7,1,Wild-type,0,,Proneural,50.3,0,"Standard Radiation, Alkylating Chemo",1,1,Male,1,-1.004,1,High,
TCGA.19.0957,GBM,Primary,Proneural,3,NON G-CIMP,0,10.4,1,Wild-type,0,Unmethylated,Mesenchymal,61.6,1,"Standard Radiation, Alkylating Chemo",1,1,Male,1,-0.9854,1,High,
TCGA.06.6391,GBM,Primary,Proneural,3,NON G-CIMP,0,7.2,0,Wild-type,0,Unmethylated,Mesenchymal,74.8,1,"TMZ Chemoradiation, TMZ Chemo",1,1,Male,1,-0.9734,1,High,
TCGA.08.0390,GBM,Primary,Mesenchymal,2,NON G-CIMP,0,12.7,1,Wild-type,0,Unmethylated,Mesenchymal,68.6,1,"Standard Radiation, TMZ Chemo",1,1,Male,1,-0.9688,1,High,
TCGA.06.0129,GBM,Primary,Proneural,3,NON G-CIMP,0,20.8,1,Wild-type,0,Methylated,Mesenchymal,63.5,1,"TMZ Chemoradiation, TMZ Chemo",1,1,Male,1,-0.9502,1,High,
TCGA.12.3650,GBM,Primary,Proneural,3,NON G-CIMP,0,19.3,1,Wild-type,0,Unmethylated,Mesenchymal,66.9,1,"Standard Radiation, TMZ Chemo",1,1,Female,0,-0.9454,1,High,
TCGA.41.2571,GBM,Primary,Proneural,3,NON G-CIMP,0,5.1,1,Wild-type,0,Methylated,Proneural,57.9,1,"Standard Radiation, TMZ Chemo",1,1,Male,1,-0.9104,1,High,
TCGA.06.0195,GBM,Primary,Proneural,3,G-CIMP,1,29.2,1,Wild-type,0,,Proneural,32.6,0,"Standard Radiation, TMZ Chemo",1,1,Male,1,-0.8722,1,High,
TCGA.28.2506,GBM,Primary,Classical,1,NON G-CIMP,0,11.7,1,Wild-type,0,Unmethylated,Mesenchymal,58.5,1,"Standard Radiation, TMZ Chemo",1,1,Male,1,-0.8534,1,High,
TCGA.06.0187,GBM,Primary,Classical,1,NON G-CIMP,0,7.6,1,Wild-type,0,Unmethylated,Mesenchymal,56.3,1,"Standard Radiation, TMZ Chemo",1,1,Male,1,-0.8522,1,High,
TCGA.19.1389,GBM,Primary,Mesenchymal,2,NON G-CIMP,0,0.5,1,Wild-type,0,Methylated,Proneural,65.2,1,Unspecified Radiation,0,1,Male,1,-0.8522,1,High,
TCGA.14.3477,GBM,Primary,Proneural,3,NON G-CIMP,0,39,1,Wild-type,0,,Mesenchymal,58.2,1,Standard Radiation,0,1,Male,1,-0.78,1,High,
TCGA.27.1838,GBM,Primary,Classical,1,NON G-CIMP,0,4.6,1,Wild-type,0,Unmethylated,Mesenchymal,51.1,0,"TMZ Chemoradiation, TMZ Chemo",1,1,Male,1,-0.7556,1,High,
TCGA.12.5295,GBM,Primary,Classical,1,NON G-CIMP,0,14.1,1,Wild-type,0,Unmethylated,Mesenchymal,60.7,1,"Standard Radiation, TMZ Chemo",1,1,Male,1,-0.7478,1,High,
TCGA.19.1387,GBM,Primary,Proneural,3,NON G-CIMP,0,26.7,1,Wild-type,0,Unmethylated,Classical,63.7,1,"Standard Radiation, Alkylating Chemo",1,1,Female,0,-0.7464,1,High,
TCGA.19.5950,GBM,Primary,Classical,1,NON G-CIMP,0,7.6,0,Wild-type,0,Unmethylated,Mesenchymal,61,1,"TMZ Chemoradiation, TMZ Chemo",1,1,Female,0,-0.738,1,High,
TCGA.12.3653,GBM,Primary,Classical,1,NON G-CIMP,0,15.9,1,Wild-type,0,Methylated,Mesenchymal,60.3,1,"Standard Radiation, Alkylating Chemo",1,1,Female,0,-0.7252,1,High,
TCGA.19.5958,GBM,Primary,Classical,1,NON G-CIMP,0,4.5,1,Wild-type,0,Unmethylated,Classical,68.7,1,"Nonstandard Radiation, TMZ Chemo",1,1,Male,1,-0.7096,1,High,
TCGA.12.0618,GBM,Primary,Proneural,3,NON G-CIMP,0,2,1,Wild-type,0,Methylated,Mesenchymal,67.9,1,Unspecified Radiation,0,1,Male,1,-0.6346,1,High,
TCGA.12.0828,GBM,Primary,Classical,1,NON G-CIMP,0,2.7,1,Wild-type,0,,Classical,53.8,0,Standard Radiation,0,1,Male,1,-0.6344,1,High,
TCGA.02.0047,GBM,Primary,Proneural,3,NON G-CIMP,0,4.7,0,Wild-type,0,Unmethylated,Classical,48.6,0,"Standard Radiation, TMZ Chemo",1,1,Male,1,-0.559,1,High,
TCGA.02.0070,GBM,Primary,Mesenchymal,2,NON G-CIMP,0,13.8,1,Wild-type,0,Methylated,Classical,64.8,1,"TMZ Chemoradiation, TMZ Chemo",1,1,Female,0,-0.5466,1,High,
TCGA.06.5417,GBM,Primary,Proneural,3,NON G-CIMP,0,20.8,1,Wild-type,0,Methylated,Mesenchymal,58,1,"TMZ Chemoradiation, TMZ Chemo",1,1,Female,0,-0.5098,1,High,
TCGA.06.2563,GBM,Primary,Classical,1,NON G-CIMP,0,15.3,1,Wild-type,0,,Neural,59.2,1,"Nonstandard Radiation, TMZ Chemo",1,1,Male,1,-0.4834,1,High,
TCGA.19.2623,GBM,Primary,Mesenchymal,2,NON G-CIMP,0,51.3,1,Wild-type,0,Methylated,Mesenchymal,63.8,1,"TMZ Chemoradiation, TMZ Chemo",1,1,Female,0,-0.4774,1,High,
TCGA.06.0166,GBM,Primary,Proneural,3,NON G-CIMP,0,16.6,1,Wild-type,0,Unmethylated,Mesenchymal,50,0,"Standard Radiation, TMZ Chemo",1,1,Male,1,-0.4268,1,High,
TCGA.19.1788,GBM,Primary,Classical,1,NON G-CIMP,0,3.2,1,Wild-type,0,,Classical,63.3,1,Standard Radiation,0,1,Female,0,-0.4094,1,High,
TCGA.02.0115,GBM,Primary,Classical,1,NON G-CIMP,0,14,1,Wild-type,0,,Mesenchymal,69.3,1,"TMZ Chemoradiation, TMZ Chemo",1,1,Male,1,-0.4024,1,High,
TCGA.06.0127,GBM,Primary,Classical,1,NON G-CIMP,0,19.9,0,Wild-type,0,Methylated,Mesenchymal,47.2,0,"TMZ Chemoradiation, TMZ Chemo",1,1,Female,0,-0.3878,1,High,
TCGA.14.1456,GBM,Primary,Proneural,3,NON G-CIMP,0,23.5,1,Wild-type,0,Methylated,Neural,46,0,"Standard Radiation, TMZ Chemo",1,1,Male,1,-0.3568,1,High,
TCGA.08.0352,GBM,Primary,Mesenchymal,2,NON G-CIMP,0,5.7,1,Wild-type,0,Methylated,Classical,78.7,1,Nonstandard Radiation,0,1,Male,1,-0.312,1,High,
TCGA.32.1979,GBM,Primary,Classical,1,NON G-CIMP,0,4.9,1,Wild-type,0,Methylated,Proneural,83.7,1,"TMZ Chemoradiation, TMZ Chemo",1,1,Male,1,-0.2634,1,High,
TCGA.06.0158,GBM,Primary,Classical,1,NON G-CIMP,0,19.7,1,Wild-type,0,Methylated,Mesenchymal,50,0,"TMZ Chemoradiation, TMZ Chemo",1,1,Male,1,-0.2336,1,High,
TCGA.06.0189,GBM,Primary,Mesenchymal,2,NON G-CIMP,0,11.2,1,Wild-type,0,Methylated,Mesenchymal,54.9,0,"TMZ Chemoradiation, TMZ Chemo",1,1,Male,1,-0.1768,1,High,
TCGA.06.0237,GBM,Primary,Proneural,3,NON G-CIMP,0,34.9,1,Wild-type,0,Unmethylated,Classical,60,1,"TMZ Chemoradiation, TMZ Chemo",1,1,Male,1,-0.1642,1,High,
TCGA.06.0206,GBM,Primary,Mesenchymal,2,NON G-CIMP,0,12.6,1,Wild-type,0,Unmethylated,Mesenchymal,81.5,1,"Nonstandard Radiation, TMZ Chemo",1,1,Male,1,-0.1462,1,High,
TCGA.08.0385,GBM,Primary,Proneural,3,NON G-CIMP,0,3.1,1,Wild-type,0,Methylated,Classical,85.6,1,"Nonstandard Radiation, TMZ Chemo",1,1,Female,0,-0.0484,1,High,
TCGA.06.0879,GBM,Primary,Classical,1,NON G-CIMP,0,5.1,1,Wild-type,0,Unmethylated,Mesenchymal,56.5,1,"TMZ Chemoradiation, TMZ Chemo",1,1,Male,1,-0.011,1,High,
TCGA.12.0827,GBM,Primary,Mesenchymal,2,NON G-CIMP,0,20.6,1,Wild-type,0,,Classical,50.4,0,"Standard Radiation, Alkylating Chemo",1,1,Male,1,-0.0018,1,High,
TCGA.14.1458,GBM,Primary,Proneural,3,NON G-CIMP,0,12.2,1,Wild-type,0,Unmethylated,Mesenchymal,63.3,1,"TMZ Chemoradiation, TMZ Chemo",1,1,Male,1,0.0004,1,High,
TCGA.06.0168,GBM,Primary,Mesenchymal,2,NON G-CIMP,0,26.8,1,Wild-type,0,Methylated,Mesenchymal,61.1,1,"Standard Radiation, TMZ Chemo",1,1,Male,1,0.0138,1,High,
TCGA.14.1821,GBM,Primary,Proneural,3,NON G-CIMP,0,0.2,1,Wild-type,0,Unmethylated,Mesenchymal,63.3,1,Unspecified Radiation,0,1,Female,0,0.0754,1,High,
TCGA.27.2523,GBM,Primary,Classical,1,NON G-CIMP,0,2.8,1,Wild-type,0,Methylated,Mesenchymal,55,0,Standard Radiation,0,1,Male,1,0.125,1,High,
TCGA.28.2502,GBM,Primary,Mesenchymal,2,NON G-CIMP,0,20.8,1,Wild-type,0,Unmethylated,Neural,30.4,0,"TMZ Chemoradiation, TMZ Chemo",1,1,Male,1,0.2148,1,High,
TCGA.32.4208,GBM,Primary,Proneural,3,NON G-CIMP,0,5.2,1,Wild-type,0,Unmethylated,Mesenchymal,63.2,1,"Standard Radiation, TMZ Chemo",1,1,Male,1,0.2358,1,High,
TCGA.06.1087,GBM,Primary,Proneural,3,NON G-CIMP,0,0.7,0,Wild-type,0,Unmethylated,Mesenchymal,65.2,1,Nonstandard Radiation,0,1,Male,1,0.2384,1,High,
TCGA.02.0084,GBM,Primary,Mesenchymal,2,NON G-CIMP,0,1.1,1,Wild-type,0,Methylated,Classical,83.3,1,Unspecified Radiation,0,1,Male,1,0.2486,1,High,
TCGA.08.0246,GBM,Primary,Classical,1,NON G-CIMP,0,9.9,1,Wild-type,0,Unmethylated,Mesenchymal,59.4,1,"Nonstandard Radiation, TMZ Chemo",1,1,Female,0,0.4248,1,High,
TCGA.08.0356,GBM,Primary,Classical,1,NON G-CIMP,0,10.4,1,Wild-type,0,,Mesenchymal,62.5,1,"Standard Radiation, TMZ Chemo",1,1,Male,1,0.4536,1,High,
TCGA.12.0616,GBM,Primary,Proneural,3,NON G-CIMP,0,16.9,1,Wild-type,0,Unmethylated,Classical,60.3,1,"TMZ Chemoradiation, TMZ Chemo",1,1,Male,1,0.4808,1,High,
TCGA.06.5410,GBM,Primary,Mesenchymal,2,NON G-CIMP,0,7.6,1,Wild-type,0,,Mesenchymal,75.5,1,"TMZ Chemoradiation, TMZ Chemo",1,1,Female,0,0.5528,1,High,
TCGA.12.0692,GBM,Primary,Mesenchymal,2,NON G-CIMP,0,12.9,1,Wild-type,0,Unmethylated,Mesenchymal,57.5,1,"TMZ Chemoradiation, TMZ Chemo",1,1,Male,1,0.586,1,High,
TCGA.32.1991,GBM,Primary,Classical,1,NON G-CIMP,0,10.8,1,Wild-type,0,Methylated,Mesenchymal,69.7,1,"TMZ Chemoradiation, TMZ Chemo",1,1,Male,1,0.645,1,High,
TCGA.28.5209,GBM,Primary,Mesenchymal,2,NON G-CIMP,0,91,0,Wild-type,0,,Mesenchymal,35,0,"Standard Radiation, TMZ Chemo",1,1,Male,1,0.7142,1,High,
TCGA.02.0075,GBM,Primary,Mesenchymal,2,NON G-CIMP,0,12.6,1,Wild-type,0,,Mesenchymal,71.9,1,"Standard Radiation, TMZ Chemo",1,1,Male,1,0.8326,1,High,
TCGA.28.1755,GBM,Primary,Classical,1,NON G-CIMP,0,11.3,1,Wild-type,0,,Mesenchymal,59.2,1,"TMZ Chemoradiation, TMZ Chemo",1,1,Male,1,1.005,1,High,
TCGA.16.0850,GBM,Primary,Proneural,3,NON G-CIMP,0,7.7,1,Wild-type,0,,Mesenchymal,40.9,0,"Unspecified Radiation, Alkylating Chemo",1,1,Male,1,1.1468,1,High,
TCGA.06.0190,GBM,Primary,Mesenchymal,2,NON G-CIMP,0,12.9,1,Wild-type,0,Unmethylated,Mesenchymal,54.2,0,"TMZ Chemoradiation, TMZ Chemo",1,1,Male,1,1.8102,1,High,
TCGA.02.0003,GBM,Primary,Proneural,3,NON G-CIMP,0,42.7,1,Wild-type,0,,Mesenchymal,47.6,0,"Standard Radiation, TMZ Chemo",1,1,Male,1,2.1326,1,High,
