# Supplementary material for: Lysyl oxidase-like 1 predicts the prognosis of patients with primary glioblastoma and promotes tumor invasion via EMT pathway
Source: PeerJ. 2024 Jul 5;12:e17579. doi: 10.7717/peerj.17579 (PMC11229686; doi:10.7717/peerj.17579)
Supplement: Supplemental Information 4 [file peerj-12-17579-s004.xlsx]

## Sheet: Sheet1
Sample	Histology	Grade	Recurrence	survival	status	IDH_status	IDH	Radio_status	Chemo_status	Age	AgeC	Age C1	Gender	GenderC	LOXL1_mRNA	LOXL1C
CGGA_1542	GBM	IV	Primary	6	0	Mutant	1	1	1	26	0	26	Male	1	-0.556393	0
CGGA_1699	GBM	IV	Primary	56.2	0	Mutant	1	1	1	41	0	41	Female	0	-0.454032	0
CGGA_1635	GBM	IV	Primary	10.9	1	Wildtype	0	1	1	43	0	43	Female	0	-0.358454	0
CGGA_1467	GBM	IV	Primary	28.5	1	Mutant	1	1	0	58	1	58	Male	1	-0.152003	0
CGGA_1650	GBM	IV	Primary	42.2	1	Mutant	1	1	1	36	0	36	Male	1	-0.0892673	0
CGGA_P178	GBM	IV	Primary	35.5	0	Wildtype	0	1	1	52	0	52	Female	0	0.0143553	0
CGGA_491	GBM	IV	Primary	35.3	1	Mutant	1	1	1	36	0	36	Female	0	0.176323	0
CGGA_1219	GBM	IV	Primary	69.7	1	Mutant	1	1	1	57	1	57	Female	0	0.275007	0
CGGA_P136	GBM	IV	Primary	27.7	1	Wildtype	0	1	1	41	0	41	Female	0	0.298658	0
CGGA_1017	GBM	IV	Primary	25.2	1	Wildtype	0	1	0	29	0	29	Female	0	0.333424	0
CGGA_1287	GBM	IV	Primary	17.5	1	Mutant	1	1	1	29	0	29	Male	1	0.400538	0
CGGA_747	GBM	IV	Primary	31.9	1	Mutant	1	1	0	29	0	29	Male	1	0.432959	0
CGGA_P102	GBM	IV	Primary	41.7	1	Mutant	1	1	1	30	0	30	Male	1	0.464668	0
CGGA_1378	GBM	IV	Primary	12.4	1	Wildtype	0	1	1	47	0	47	Male	1	0.516015	0
CGGA_804	GBM	IV	Primary	20.2	0	Wildtype	0	1	1	53	0	53	Female	0	0.565597	0
CGGA_494	GBM	IV	Primary	135.1	0	Wildtype	0	1	1	58	1	58	Female	0	0.584963	0
CGGA_P112	GBM	IV	Primary	27.4	1	Wildtype	0	1	1	65	1	65	Male	1	0.687061	0
CGGA_1026	GBM	IV	Primary	51.6	1	Wildtype	0	1	1	57	1	57	Male	1	0.704872	0
CGGA_680	GBM	IV	Primary	78	1	Wildtype	0	1	1	44	0	44	Male	1	0.782409	0
CGGA_P22	GBM	IV	Primary	13.3	1	Wildtype	0	1	1	62	1	62	Male	1	0.799087	0
CGGA_1041	GBM	IV	Primary	105.3	0	Wildtype	0	1	1	58	1	58	Male	1	0.807355	0
CGGA_1780	GBM	IV	Primary	47.5	0	Wildtype	0	1	1	57	1	57	Female	0	0.807355	0
CGGA_1769	GBM	IV	Primary	48.5	0	Wildtype	0	1	1	49	0	49	Female	0	0.863938	0
CGGA_1727	GBM	IV	Primary	52.6	0	Mutant	1	1	1	48	0	48	Male	1	0.895303	0
CGGA_413	GBM	IV	Primary	6	0	Wildtype	0	1	1	54	0	54	Male	1	0.978196	0
CGGA_139	GBM	IV	Primary	22.8	1	Mutant	1	1	1	59	1	59	Male	1	0.992768	0
CGGA_1486	GBM	IV	Primary	6	1	Wildtype	0	1	1	45	0	45	Male	1	1.04264	0
CGGA_1172	GBM	IV	Primary	90.2	0	Mutant	1	1	1	36	0	36	Female	0	1.04963	0
CGGA_1740	GBM	IV	Primary	11.9	1	Wildtype	0	0	0	50	0	50	Female	0	1.1177	0
CGGA_1750	GBM	IV	Primary	8.2	1	Wildtype	0	1	1	52	0	52	Female	0	1.1635	0
CGGA_1409	GBM	IV	Primary	76.8	0	Mutant	1	1	1	24	0	24	Female	0	1.18903	0
CGGA_P205	GBM	IV	Primary	19.2	1	Wildtype	0	1	1	66	1	66	Male	1	1.22033	0
CGGA_808	GBM	IV	Primary	38.4	0	Wildtype	0	1	1	38	0	38	Male	1	1.25096	0
CGGA_1236	GBM	IV	Primary	6.3	1	Wildtype	0	0	0	47	0	47	Female	0	1.26303	0
CGGA_1418	GBM	IV	Primary	9.4	1	Wildtype	0	1	1	73	1	73	Female	0	1.28688	0
CGGA_P164	GBM	IV	Primary	39.1	0	Wildtype	0	1	1	27	0	27	Male	1	1.28688	0
CGGA_1384	GBM	IV	Primary	6.3	1	Mutant	1	1	1	39	0	39	Female	0	1.29278	0
CGGA_1539	GBM	IV	Primary	68.6	0	Mutant	1	1	1	61	1	61	Male	1	1.31034	0
CGGA_1764	GBM	IV	Primary	23.3	1	Mutant	1	1	1	33	0	33	Male	1	1.34483	0
CGGA_1382	GBM	IV	Primary	9.3	1	Wildtype	0	1	1	57	1	57	Male	1	1.35614	0
CGGA_1728	GBM	IV	Primary	30.1	1	Mutant	1	1	1	45	0	45	Male	1	1.39506	0
CGGA_1420	GBM	IV	Primary	12	1	Wildtype	0	1	1	60	1	60	Male	1	1.40054	0
CGGA_1722	GBM	IV	Primary	11.5	1	Wildtype	0	1	1	60	1	60	Female	0	1.41143	0
CGGA_1422	GBM	IV	Primary	6.7	1	Wildtype	0	1	1	76	1	76	Male	1	1.43296	0
CGGA_1476	GBM	IV	Primary	9.8	1	Wildtype	0	0	0	53	0	53	Female	0	1.48027	0
CGGA_1365	GBM	IV	Primary	8.3	1	Wildtype	0	1	1	55	0	55	Male	1	1.48543	0
CGGA_1503	GBM	IV	Primary	25.5	1	Wildtype	0	1	1	47	0	47	Male	1	1.5008	0
CGGA_700	GBM	IV	Primary	5.6	0	Mutant	1	1	1	24	0	24	Female	0	1.5008	0
CGGA_1103	GBM	IV	Primary	19.2	1	Mutant	1	1	1	35	0	35	Female	0	1.50589	0
CGGA_1135	GBM	IV	Primary	40.9	1	Wildtype	0	1	1	40	0	40	Male	1	1.52105	0
CGGA_1735	GBM	IV	Primary	26.7	1	Wildtype	0	1	1	54	0	54	Male	1	1.5656	0
CGGA_342	GBM	IV	Primary	16.4	1	Wildtype	0	1	1	49	0	49	Female	0	1.72683	0
CGGA_759	GBM	IV	Primary	41.5	1	Mutant	1	1	1	30	0	30	Male	1	1.76129	0
CGGA_761	GBM	IV	Primary	60.5	1	Mutant	1	1	0	45	0	45	Male	1	1.80735	0
CGGA_1444	GBM	IV	Primary	12.4	1	Wildtype	0	1	1	68	1	68	Female	0	1.91073	0
CGGA_1534	GBM	IV	Primary	0.9	1	Mutant	1	0	0	58	1	58	Female	0	1.95606	0
CGGA_1571	GBM	IV	Primary	13.5	0	Mutant	1	1	1	43	0	43	Female	0	1.97085	0
CGGA_499	GBM	IV	Primary	4	1	Wildtype	0	1	0	51	0	51	Male	1	1.9855	0
CGGA_710	GBM	IV	Primary	21.7	1	Mutant	1	0	1	41	0	41	Male	1	1.99639	0
CGGA_658	GBM	IV	Primary	12.2	1	Wildtype	0	1	0	55	0	55	Male	1	2	0
CGGA_1494	GBM	IV	Primary	8.8	1	Wildtype	0	1	1	21	0	21	Male	1	2.0036	0
CGGA_P180	GBM	IV	Primary	8.5	1	Mutant	1	1	1	47	0	47	Male	1	2.01436	0
CGGA_1870	GBM	IV	Primary	38.7	0	Mutant	1	1	1	62	1	62	Male	1	2.02503	0
CGGA_1678	GBM	IV	Primary	21.6	1	Wildtype	0	1	1	51	0	51	Male	1	2.06695	0
CGGA_1666	GBM	IV	Primary	8.2	1	Wildtype	0	1	1	60	1	60	Male	1	2.10098	0
CGGA_1007	GBM	IV	Primary	11.3	1	Wildtype	0	1	1	57	1	57	Female	0	2.10769	0
CGGA_1049	GBM	IV	Primary	26.6	1	Wildtype	0	1	1	58	1	58	Male	1	2.12763	0
CGGA_1072	GBM	IV	Primary	35.8	1	Wildtype	0	1	1	26	0	26	Male	1	2.20163	0
CGGA_1410	GBM	IV	Primary	27.1	1	Wildtype	0	1	1	27	0	27	Female	0	2.20477	0
CGGA_509	GBM	IV	Primary	20.5	1	Wildtype	0	1	1	38	0	38	Male	1	2.23573	0
CGGA_837	GBM	IV	Primary	14.2	1	Wildtype	0	1	1	57	1	57	Male	1	2.28688	0
CGGA_1840	GBM	IV	Primary	38.8	0	Wildtype	0	1	1	58	1	58	Female	0	2.43829	0
CGGA_1371	GBM	IV	Primary	79	0	Wildtype	0	1	1	68	1	68	Male	1	2.60881	0
CGGA_1086	GBM	IV	Primary	65	1	Wildtype	0	1	1	65	1	65	Female	0	2.63459	0
CGGA_1559	GBM	IV	Primary	19.8	1	Mutant	1	0	1	63	1	63	Male	1	2.76341	0
CGGA_1521	GBM	IV	Primary	6.7	1	Wildtype	0	1	1	63	1	63	Female	0	2.78031	0
CGGA_1758	GBM	IV	Primary	13.6	1	Wildtype	0	1	1	45	0	45	Female	0	2.85599	0
CGGA_1342	GBM	IV	Primary	6.1	1	Wildtype	0	1	1	47	0	47	Male	1	2.90111	0
CGGA_1314	GBM	IV	Primary	5.7	1	Mutant	1	0	0	27	0	27	Female	0	2.95233	0
CGGA_1216	GBM	IV	Primary	10.3	1	Wildtype	0	1	1	44	0	44	Male	1	2.9855	0
CGGA_1353	GBM	IV	Primary	33.6	1	Wildtype	0	1	1	65	1	65	Male	1	2.99458	0
CGGA_1053	GBM	IV	Primary	12.2	1	Wildtype	0	1	1	63	1	63	Female	0	3.04439	0
CGGA_1380	GBM	IV	Primary	9.6	1	Wildtype	0	1	1	46	0	46	Male	1	3.04439	0
CGGA_1613	GBM	IV	Primary	8.2	0	Wildtype	0	1	1	53	0	53	Male	1	3.04789	0
CGGA_1596	GBM	IV	Primary	6.7	1	Wildtype	0	1	1	63	1	63	Male	1	3.07039	0
CGGA_1626	GBM	IV	Primary	22.9	1	Wildtype	0	1	1	66	1	66	Male	1	3.08576	0
CGGA_1073	GBM	IV	Primary	8.9	1	Wildtype	0	1	0	42	0	42	Female	0	3.11603	0
CGGA_1634	GBM	IV	Primary	12	1	Wildtype	0	0	0	26	0	26	Female	0	3.12928	0
CGGA_1713	GBM	IV	Primary	10.9	1	Wildtype	0	1	1	62	1	62	Male	1	3.15543	0
CGGA_1114	GBM	IV	Primary	15.1	1	Wildtype	0	1	1	53	0	53	Male	1	3.24793	0
CGGA_1597	GBM	IV	Primary	5.7	1	Wildtype	0	1	1	58	1	58	Male	1	3.27798	0
CGGA_789	GBM	IV	Primary	11.3	1	Wildtype	0	1	0	50	0	50	Male	1	3.29425	0
CGGA_1171	GBM	IV	Primary	13.5	1	Wildtype	0	1	1	40	0	40	Male	1	3.3147	0
CGGA_782	GBM	IV	Primary	9.5	1	Wildtype	0	1	0	60	1	60	Male	1	3.32769	0
CGGA_1282	GBM	IV	Primary	36.7	1	Wildtype	0	1	1	33	0	33	Female	0	3.34767	0
CGGA_D30	GBM	IV	Primary	7.1	1	Wildtype	0	1	0	70	1	70	Male	1	3.36457	0
CGGA_1313	GBM	IV	Primary	12.5	1	Wildtype	0	1	1	42	0	42	Male	1	3.37156	1
CGGA_1500	GBM	IV	Primary	3.6	1	Wildtype	0	1	1	45	0	45	Female	0	3.37295	1
CGGA_P28	GBM	IV	Primary	3.5	1	Wildtype	0	0	0	61	1	61	Male	1	3.38957	1
CGGA_878	GBM	IV	Primary	28.4	1	Wildtype	0	0	1	42	0	42	Male	1	3.40871	1
CGGA_1251	GBM	IV	Primary	8.9	1	Wildtype	0	1	1	42	0	42	Female	0	3.44361	1
CGGA_1392	GBM	IV	Primary	15.6	1	Wildtype	0	1	1	62	1	62	Male	1	3.44361	1
CGGA_1425	GBM	IV	Primary	21	1	Wildtype	0	1	1	22	0	22	Female	0	3.46074	1
CGGA_1560	GBM	IV	Primary	15.1	1	Mutant	1	1	1	35	0	35	Female	0	3.47897	1
CGGA_1709	GBM	IV	Primary	13.6	1	Wildtype	0	1	1	47	0	47	Male	1	3.48543	1
CGGA_P160	GBM	IV	Primary	7.2	1	Wildtype	0	1	1	72	1	72	Female	0	3.53605	1
CGGA_1491	GBM	IV	Primary	8.1	1	Mutant	1	1	1	29	0	29	Male	1	3.54226	1
CGGA_1564	GBM	IV	Primary	6.2	1	Wildtype	0	1	1	48	0	48	Male	1	3.5472	1
CGGA_859	GBM	IV	Primary	12.7	1	Wildtype	0	1	0	56	1	56	Male	1	3.55582	1
CGGA_1258	GBM	IV	Primary	3.7	1	Wildtype	0	0	0	42	0	42	Male	1	3.58135	1
CGGA_1403	GBM	IV	Primary	22.3	1	Wildtype	0	1	1	43	0	43	Female	0	3.58736	1
CGGA_802	GBM	IV	Primary	22.4	1	Wildtype	0	1	1	42	0	42	Male	1	3.59216	1
CGGA_1008	GBM	IV	Primary	10.4	1	Wildtype	0	1	1	54	0	54	Female	0	3.61353	1
CGGA_676	GBM	IV	Primary	12.4	1	Wildtype	0	1	0	60	1	60	Male	1	3.61471	1
CGGA_1299	GBM	IV	Primary	18.1	1	Wildtype	0	1	1	54	0	54	Male	1	3.6241	1
CGGA_1452	GBM	IV	Primary	15.4	1	Wildtype	0	1	1	53	0	53	Male	1	3.63227	1
CGGA_1075	GBM	IV	Primary	13.1	1	Wildtype	0	1	1	72	1	72	Male	1	3.66107	1
CGGA_1543	GBM	IV	Primary	23.8	1	Mutant	1	1	0	57	1	57	Male	1	3.71589	1
CGGA_1124	GBM	IV	Primary	15.9	1	Wildtype	0	1	1	47	0	47	Male	1	3.72792	1
CGGA_1433	GBM	IV	Primary	13	1	Wildtype	0	1	1	72	1	72	Female	0	3.73118	1
CGGA_679	GBM	IV	Primary	8.6	1	Wildtype	0	1	0	63	1	63	Female	0	3.76977	1
CGGA_1036	GBM	IV	Primary	26.5	1	Wildtype	0	1	1	41	0	41	Male	1	3.78136	1
CGGA_1586	GBM	IV	Primary	7.6	1	Wildtype	0	1	1	55	0	55	Female	0	3.7939	1
CGGA_1142	GBM	IV	Primary	33	1	Wildtype	0	1	1	60	1	60	Male	1	3.83592	1
CGGA_1237	GBM	IV	Primary	9.7	1	Wildtype	0	1	1	62	1	62	Male	1	3.87676	1
CGGA_1275	GBM	IV	Primary	6	1	Wildtype	0	1	1	70	1	70	Male	1	3.90111	1
CGGA_1240	GBM	IV	Primary	0.6	1	Wildtype	0	0	0	33	0	33	Male	1	3.91265	1
CGGA_1690	GBM	IV	Primary	19.5	1	Wildtype	0	1	1	60	1	60	Male	1	3.93357	1
CGGA_731	GBM	IV	Primary	16.5	1	Wildtype	0	1	0	50	0	50	Male	1	3.93357	1
CGGA_1478	GBM	IV	Primary	17.8	1	Wildtype	0	1	1	72	1	72	Female	0	3.93452	1
CGGA_1426	GBM	IV	Primary	4.4	1	Wildtype	0	1	1	50	0	50	Female	0	3.94111	1
CGGA_831	GBM	IV	Primary	18	1	Wildtype	0	1	1	55	0	55	Female	0	3.94111	1
CGGA_1391	GBM	IV	Primary	14	0	Wildtype	0	1	1	62	1	62	Male	1	3.95047	1
CGGA_1901	GBM	IV	Primary	17.8	1	Wildtype	0	1	1	60	1	60	Male	1	3.99277	1
CGGA_1214	GBM	IV	Primary	19.9	1	Wildtype	0	1	1	49	0	49	Female	0	4.01614	1
CGGA_P143	GBM	IV	Primary	8.6	1	Wildtype	0	1	1	66	1	66	Female	0	4.04963	1
CGGA_1138	GBM	IV	Primary	13.5	1	Wildtype	0	1	1	54	0	54	Male	1	4.07724	1
CGGA_1180	GBM	IV	Primary	40.3	0	Wildtype	0	1	1	48	0	48	Female	0	4.0781	1
CGGA_1817	GBM	IV	Primary	13.1	1	Wildtype	0	1	1	72	1	72	Female	0	4.10518	1
CGGA_1074	GBM	IV	Primary	2.8	1	Wildtype	0	1	1	50	0	50	Male	1	4.11603	1
CGGA_1441	GBM	IV	Primary	61.9	1	Wildtype	0	1	1	70	1	70	Male	1	4.13258	1
CGGA_1681	GBM	IV	Primary	11.4	1	Wildtype	0	1	1	58	1	58	Female	0	4.16591	1
CGGA_604	GBM	IV	Primary	12.5	1	Wildtype	0	1	1	46	0	46	Male	1	4.18666	1
CGGA_1270	GBM	IV	Primary	6.2	1	Wildtype	0	1	1	60	1	60	Female	0	4.24717	1
CGGA_1139	GBM	IV	Primary	39.3	1	Wildtype	0	1	1	53	0	53	Female	0	4.25323	1
CGGA_1332	GBM	IV	Primary	16.8	0	Wildtype	0	0	1	55	0	55	Female	0	4.29057	1
CGGA_1601	GBM	IV	Primary	23.3	1	Wildtype	0	1	1	66	1	66	Male	1	4.29131	1
CGGA_1011	GBM	IV	Primary	3.6	1	Wildtype	0	1	0	46	0	46	Female	0	4.30961	1
CGGA_1106	GBM	IV	Primary	13.8	1	Wildtype	0	1	1	37	0	37	Male	1	4.31397	1
CGGA_1698	GBM	IV	Primary	12.8	1	Wildtype	0	0	0	55	0	55	Female	0	4.31687	1
CGGA_1833	GBM	IV	Primary	16.2	1	Wildtype	0	1	1	60	1	60	Female	0	4.33985	1
CGGA_P609	GBM	IV	Primary	12.5	0	Wildtype	0	0	0	19	0	19	Female	0	4.36177	1
CGGA_1035	GBM	IV	Primary	18.6	1	Wildtype	0	1	1	60	1	60	Female	0	4.4489	1
CGGA_D09	GBM	IV	Primary	7.7	1	Wildtype	0	1	0	57	1	57	Male	1	4.46074	1
CGGA_274	GBM	IV	Primary	20.1	0	Wildtype	0	1	1	55	0	55	Female	0	4.46923	1
CGGA_1083	GBM	IV	Primary	14.8	1	Wildtype	0	1	1	59	1	59	Male	1	4.50462	1
CGGA_1462	GBM	IV	Primary	5.7	1	Wildtype	0	1	1	49	0	49	Male	1	4.50526	1
CGGA_1070	GBM	IV	Primary	10.9	1	Wildtype	0	1	0	37	0	37	Male	1	4.52105	1
CGGA_1694	GBM	IV	Primary	20.5	1	Wildtype	0	1	1	55	0	55	Male	1	4.54288	1
CGGA_1826	GBM	IV	Primary	1.4	1	Wildtype	0	0	0	70	1	70	Female	0	4.54659	1
CGGA_D37	GBM	IV	Primary	31.7	1	Wildtype	0	1	1	55	0	55	Male	1	4.58856	1
CGGA_1749	GBM	IV	Primary	13.2	1	Wildtype	0	1	1	44	0	44	Female	0	4.61765	1
CGGA_1612	GBM	IV	Primary	23.6	1	Wildtype	0	1	1	68	1	68	Male	1	4.63227	1
CGGA_1224	GBM	IV	Primary	8.9	1	Wildtype	0	1	1	57	1	57	Male	1	4.64212	1
CGGA_848	GBM	IV	Primary	7.9	0	Wildtype	0	1	0	54	0	54	Female	0	4.65191	1
CGGA_1320	GBM	IV	Primary	1.9	1	Wildtype	0	0	1	19	0	19	Male	1	4.67356	1
CGGA_1338	GBM	IV	Primary	36.9	1	Wildtype	0	1	1	61	1	61	Female	0	4.67807	1
CGGA_1039	GBM	IV	Primary	23.9	1	Wildtype	0	0	1	40	0	40	Male	1	4.70543	1
CGGA_1548	GBM	IV	Primary	34.7	1	Wildtype	0	1	1	53	0	53	Male	1	4.76075	1
CGGA_1234	GBM	IV	Primary	23.2	1	Wildtype	0	1	1	32	0	32	Male	1	4.76713	1
CGGA_1546	GBM	IV	Primary	7.3	1	Wildtype	0	0	1	56	1	56	Male	1	4.83137	1
CGGA_1077	GBM	IV	Primary	19.4	1	Wildtype	0	1	0	47	0	47	Male	1	4.8485	1
CGGA_D03	GBM	IV	Primary	13.9	1	Wildtype	0	1	0	44	0	44	Male	1	4.90256	1
CGGA_1045	GBM	IV	Primary	11.4	1	Wildtype	0	1	1	79	1	79	Male	1	4.91121	1
CGGA_1091	GBM	IV	Primary	36.7	1	Wildtype	0	1	1	51	0	51	Female	0	4.91313	1
CGGA_D57	GBM	IV	Primary	25.2	1	Wildtype	0	1	1	40	0	40	Male	1	4.91409	1
CGGA_1024	GBM	IV	Primary	101.1	1	Wildtype	0	1	1	64	1	64	Male	1	4.95373	1
CGGA_1736	GBM	IV	Primary	30.8	1	Wildtype	0	1	1	57	1	57	Female	0	4.96717	1
CGGA_850	GBM	IV	Primary	18.5	0	Wildtype	0	0	0	52	0	52	Female	0	5.05311	1
CGGA_1461	GBM	IV	Primary	7.4	1	Wildtype	0	1	1	60	1	60	Female	0	5.10811	1
CGGA_1354	GBM	IV	Primary	17.4	1	Wildtype	0	1	1	40	0	40	Female	0	5.19338	1
CGGA_1023	GBM	IV	Primary	22.4	1	Wildtype	0	1	1	56	1	56	Female	0	5.27165	1
CGGA_1326	GBM	IV	Primary	10.6	1	Mutant	1	1	0	45	0	45	Male	1	5.28725	1
CGGA_1451	GBM	IV	Primary	14.4	1	Wildtype	0	1	1	45	0	45	Female	0	5.34696	1
CGGA_1457	GBM	IV	Primary	10.3	1	Wildtype	0	1	1	60	1	60	Male	1	5.40769	1
CGGA_525	GBM	IV	Primary	4.5	1	Wildtype	0	1	0	61	1	61	Male	1	5.4353	1
CGGA_1708	GBM	IV	Primary	36.9	1	Wildtype	0	1	1	54	0	54	Female	0	5.71094	1
CGGA_1134	GBM	IV	Primary	1.9	1	Wildtype	0	0	1	56	1	56	Female	0	5.75302	1
CGGA_1644	GBM	IV	Primary	5.7	1	Wildtype	0	1	1	48	0	48	Male	1	5.9357	1
CGGA_D35	GBM	IV	Primary	21.7	1	Wildtype	0	1	0	68	1	68	Female	0	6.53885	1
CGGA_483	GBM	IV	Primary	9.1	1	Wildtype	0	1	1	59	1	59	Female	0	6.86592	1
CGGA_1015	GBM	IV	Primary	5.4	1	Wildtype	0	1	0	62	1	62	Male	1	6.99266	1
CGGA_842	GBM	IV	Primary	6.7	1	Wildtype	0	1	1	63	1	63	Female	0	7.02713	1
