# Supplementary material for: Lysyl oxidase-like 1 predicts the prognosis of patients with primary glioblastoma and promotes tumor invasion via EMT pathway
Source: PeerJ. 2024 Jul 5;12:e17579. doi: 10.7717/peerj.17579 (PMC11229686; doi:10.7717/peerj.17579)
Supplement: Supplemental Information 5 [file peerj-12-17579-s005.xlsx]

## Sheet: Sheet2
Sample	Histology	Recurrence	Subtype	SubtypeC	CIMP_status	CIMPC	survival	status	IDH1_status	IDH1C	MGMT_status	MGMTC	Age	AgeC	Therapy_Class	ChemoC	RadioC	Gender	GenderC	LOXL1_mRNA	loxl1C
TCGA.02.0011	GBM	Primary	Proneural	3	NON G-CIMP	0	20.7	1	Wild-type	0	Methylated	1	19	0	TMZ Chemoradiation, TMZ Chemo	1	1	Female	0	3.6146	0
TCGA.02.0038	GBM	Primary	Classical	1	NON G-CIMP	0	10.7	1	Wild-type	0	Unmethylated	0	48.6	0	Standard Radiation	0	1	Female	0	3.7965	0
TCGA.12.3653	GBM	Primary	Classical	1	NON G-CIMP	0	14.5	1	Wild-type	0	Unmethylated	0	34.3	0	TMZ Chemoradiation, TMZ Chemo	1	1	Female	0	3.997	0
TCGA.41.2573	GBM	Primary	Proneural	3	NON G-CIMP	0	8.9	0	Wild-type	0	Methylated	1	60	1	TMZ Chemoradiation, TMZ Chemo	1	1	Male	1	4.0295	0
TCGA.76.4925	GBM	Primary	Proneural	3	NON G-CIMP	0	4.8	1	Wild-type	0	Methylated	1	76.7	1	Nonstandard Radiation, TMZ Chemo	1	1	Male	1	4.1179	0
TCGA.14.1821	GBM	Primary	Proneural	3	G-CIMP	1	17.8	1	Mutant	1	Methylated	1	31	0	TMZ Chemoradiation, TMZ Chemo	1	1	Male	1	4.1184	0
TCGA.16.0846	GBM	Primary	Proneural	3	NON G-CIMP	0	3.9	1	Wild-type	0	Methylated	1	85.2	1	Unspecified Radiation	0	1	Male	1	4.1232	0
TCGA.02.0047	GBM	Primary	Proneural	3	NON G-CIMP	0	14.7	1	Wild-type	0	Unmethylated	0	78.7	1	Standard Radiation	0	1	Male	1	4.2238	0
TCGA.14.4157	GBM	Primary	Proneural	3	G-CIMP	1	3.4	0	Mutant	1	Methylated	1	40.6	0	TMZ Chemoradiation, TMZ Chemo	1	1	Male	1	4.225	0
TCGA.27.1835	GBM	Primary	Classical	1	NON G-CIMP	0	21.3	1	Wild-type	0	Methylated	1	53.2	0	TMZ Chemoradiation, TMZ Chemo	1	1	Female	0	4.2269	0
TCGA.12.3646	GBM	Primary	Proneural	3	NON G-CIMP	0	44	1	Wild-type	0	Methylated	1	59.8	1	TMZ Chemoradiation, TMZ Chemo	1	1	Female	0	4.2279	0
TCGA.06.0133	GBM	Primary	Classical	1	NON G-CIMP	0	14.3	1	Wild-type	0	Unmethylated	0	64.1	1	TMZ Chemoradiation, TMZ Chemo	1	1	Male	1	4.2671	0
TCGA.14.1458	GBM	Primary	Proneural	3	G-CIMP	1	6.7	1	Mutant	1	Methylated	1	54.5	0	TMZ Chemoradiation, TMZ Chemo	1	1	Male	1	4.2915	0
TCGA.06.2570	GBM	Primary	Proneural	3	G-CIMP	1	31.5	0	Mutant	1	Methylated	1	21.7	0	TMZ Chemoradiation, TMZ Chemo	1	1	Female	0	4.2999	0
TCGA.12.1600	GBM	Primary	Classical	1	NON G-CIMP	0	14.7	1	Wild-type	0	Unmethylated	0	86	1	TMZ Chemoradiation, TMZ Chemo	1	1	Male	1	4.3228	0
TCGA.27.2519	GBM	Primary	Mesenchymal	2	NON G-CIMP	0	18.1	1	Wild-type	0	Unmethylated	0	48.5	0	TMZ Chemoradiation, TMZ Chemo	1	1	Male	1	4.3261	0
TCGA.12.1089	GBM	Primary	Classical	1	NON G-CIMP	0	5.8	1	Wild-type	0	Unmethylated	0	64.1	1	Standard Radiation, Alkylating Chemo	1	1	Male	1	4.3458	0
TCGA.19.1788	GBM	Primary	Classical	1	G-CIMP	1	3.7	1	Mutant	1	Methylated	1	39.1	0	TMZ Chemoradiation, TMZ Chemo	1	1	Male	1	4.3834	0
TCGA.14.1823	GBM	Primary	Mesenchymal	2	NON G-CIMP	0	17.9	1	Wild-type	0	Methylated	1	58.5	1	TMZ Chemoradiation, TMZ Chemo	1	1	Female	0	4.409	0
TCGA.32.1970	GBM	Primary	Classical	1	NON G-CIMP	0	15.4	1	Wild-type	0	Unmethylated	0	59.2	1	TMZ Chemoradiation, TMZ Chemo	1	1	Male	1	4.4127	0
TCGA.28.1746	GBM	Primary	Proneural	3	NON G-CIMP	0	0.2	0	Wild-type	0	Methylated	1	77.5	1	Unspecified Radiation	0	1	Female	0	4.415	0
TCGA.16.0850	GBM	Primary	Proneural	3	G-CIMP	1	16.4	1	Mutant	1	Unmethylated	0	52.8	0	Standard Radiation	0	1	Female	0	4.4447	0
TCGA.26.1442	GBM	Primary	Proneural	3	G-CIMP	1	31.3	0	Mutant	1	Methylated	1	43.7	0	TMZ Chemoradiation, TMZ Chemo	1	1	Male	1	4.4801	0
TCGA.06.1801	GBM	Primary	Proneural	3	NON G-CIMP	0	11.8	1	Wild-type	0	Unmethylated	0	56.2	1	Standard Radiation, TMZ Chemo	1	1	Female	0	4.4892	0
TCGA.16.0849	GBM	Primary	Proneural	3	G-CIMP	1	26.1	0	Mutant	1	Methylated	1	54.6	0	Standard Radiation	0	1	Male	1	4.523	0
TCGA.06.5417	GBM	Primary	Proneural	3	G-CIMP	1	5.1	0	Mutant	1	Methylated	1	45.4	0	TMZ Chemoradiation, TMZ Chemo	1	1	Female	0	4.5385	0
TCGA.19.1388	GBM	Primary	Classical	1	NON G-CIMP	0	12.9	1	Wild-type	0	Methylated	1	58.5	1	TMZ Chemoradiation, TMZ Chemo	1	1	Male	1	4.5386	0
TCGA.41.2575	GBM	Primary	Proneural	3	NON G-CIMP	0	9.5	1	Wild-type	0	Unmethylated	0	75.5	1	TMZ Chemoradiation, TMZ Chemo	1	1	Male	1	4.5827	0
TCGA.06.0129	GBM	Primary	Proneural	3	G-CIMP	1	33.7	1	Mutant	1	Methylated	1	30.9	0	TMZ Chemoradiation, TMZ Chemo	1	1	Male	1	4.6087	0
TCGA.06.6389	GBM	Primary	Proneural	3	G-CIMP	1	7.8	0	Mutant	1	Methylated	1	50	0	TMZ Chemoradiation, TMZ Chemo	1	1	Female	0	4.6479	0
TCGA.06.0128	GBM	Primary	Proneural	3	G-CIMP	1	22.7	1	Mutant	1	Methylated	1	66.3	1	Standard Radiation, TMZ Chemo	1	1	Male	1	4.6548	0
TCGA.12.5295	GBM	Primary	Classical	1	NON G-CIMP	0	14.9	1	Wild-type	0	Methylated	1	60.7	1	TMZ Chemoradiation, TMZ Chemo	1	1	Female	0	4.6569	0
TCGA.06.2567	GBM	Primary	Classical	1	NON G-CIMP	0	4.4	1	Wild-type	0	Methylated	1	65	1	Nonstandard Radiation, TMZ Chemo	1	1	Male	1	4.6588	0
TCGA.14.1825	GBM	Primary	Proneural	3	NON G-CIMP	0	7.6	1	Wild-type	0	Unmethylated	0	70.3	1	Standard Radiation	0	1	Male	1	4.6837	0
TCGA.14.1456	GBM	Primary	Proneural	3	G-CIMP	1	41	0	Mutant	1	Methylated	1	23.9	0	Standard Radiation	0	1	Male	1	4.6864	0
TCGA.06.0875	GBM	Primary	Proneural	3	NON G-CIMP	0	43.5	0	Wild-type	0	Unmethylated	0	61.1	1	Standard Radiation, TMZ Chemo	1	1	Female	0	4.6875	0
TCGA.28.2506	GBM	Primary	Classical	1	NON G-CIMP	0	6.7	0	Wild-type	0	Methylated	1	63.8	1	TMZ Chemoradiation, TMZ Chemo	1	1	Female	0	4.6888	0
TCGA.32.4208	GBM	Primary	Proneural	3	G-CIMP	1	21.1	0	Mutant	1	Methylated	1	25.2	0	TMZ Chemoradiation, TMZ Chemo	1	1	Male	1	4.695	0
TCGA.14.1829	GBM	Primary	Mesenchymal	2	NON G-CIMP	0	7.2	0	Wild-type	0	Unmethylated	0	57.3	1	TMZ Chemoradiation, TMZ Chemo	1	1	Male	1	4.7007	0
TCGA.19.2629	GBM	Primary	Proneural	3	G-CIMP	1	24.2	1	Mutant	1	Unmethylated	0	60.9	1	TMZ Chemoradiation, TMZ Chemo	1	1	Male	1	4.7069	0
TCGA.14.3477	GBM	Primary	Proneural	3	NON G-CIMP	0	3.8	0	Wild-type	0	Unmethylated	0	38.5	0	TMZ Chemoradiation, TMZ Chemo	1	1	Female	0	4.707	0
TCGA.12.3648	GBM	Primary	Classical	1	NON G-CIMP	0	26.9	1	Wild-type	0	Methylated	1	61.5	1	TMZ Chemoradiation, TMZ Chemo	1	1	Female	0	4.7177	0
TCGA.16.1460	GBM	Primary	Proneural	3	G-CIMP	1	6.4	0	Mutant	1	Methylated	1	36.2	0	Unspecified Radiation	0	1	Female	0	4.732	0
TCGA.26.1799	GBM	Primary	Classical	1	NON G-CIMP	0	9.4	1	Wild-type	0	Unmethylated	0	68.9	1	Standard Radiation, TMZ Chemo	1	1	Male	1	4.7413	0
TCGA.16.1045	GBM	Primary	Mesenchymal	2	NON G-CIMP	0	29	1	Wild-type	0	Methylated	1	49.8	0	Standard Radiation	0	1	Female	0	4.7611	0
TCGA.12.3651	GBM	Primary	Proneural	3	NON G-CIMP	0	12.7	1	Wild-type	0	Methylated	1	77.4	1	TMZ Chemoradiation, TMZ Chemo	1	1	Male	1	4.7753	0
TCGA.06.5859	GBM	Primary	Classical	1	NON G-CIMP	0	4.6	0	Wild-type	0	Unmethylated	0	63.5	1	TMZ Chemoradiation, TMZ Chemo	1	1	Male	1	4.8009	0
TCGA.06.0939	GBM	Primary	Mesenchymal	2	NON G-CIMP	0	26.8	1	Wild-type	0	Unmethylated	0	79.1	1	TMZ Chemoradiation, TMZ Chemo	1	1	Female	0	4.8548	0
TCGA.19.1387	GBM	Primary	Proneural	3	NON G-CIMP	0	6	0	Wild-type	0	Methylated	1	81.8	1	TMZ Chemoradiation, TMZ Chemo	1	1	Male	1	4.8801	0
TCGA.28.5207	GBM	Primary	Mesenchymal	2	NON G-CIMP	0	11.3	1	Wild-type	0	Unmethylated	0	71.1	1	Nonstandard Radiation, TMZ Chemo	1	1	Male	1	4.9114	0
TCGA.12.0827	GBM	Primary	Mesenchymal	2	G-CIMP	1	38.8	1	Mutant	1	Methylated	1	38.6	0	Standard Radiation, TMZ Chemo	1	1	Female	0	4.9315	0
TCGA.06.1805	GBM	Primary	Proneural	3	G-CIMP	1	33.9	0	Mutant	1	Unmethylated	0	28.9	0	TMZ Chemoradiation, TMZ Chemo	1	1	Female	0	4.9355	0
TCGA.12.1598	GBM	Primary	Proneural	3	NON G-CIMP	0	15.7	1	Wild-type	0	Methylated	1	75.9	1	TMZ Chemoradiation, TMZ Chemo	1	1	Female	0	4.9708	0
TCGA.02.2466	GBM	Primary	Proneural	3	NON G-CIMP	0	16.8	1	Wild-type	0	Unmethylated	0	61.5	1	TMZ Chemoradiation, TMZ Chemo	1	1	Male	1	4.9879	0
TCGA.02.2483	GBM	Primary	Proneural	3	G-CIMP	1	15.3	0	Mutant	1	Methylated	1	43.7	0	TMZ Chemoradiation, TMZ Chemo	1	1	Male	1	4.9957	0
TCGA.12.0670	GBM	Primary	Classical	1	NON G-CIMP	0	26	1	Wild-type	0	Methylated	1	60.8	1	Standard Radiation, TMZ Chemo	1	1	Male	1	5.0067	0
TCGA.32.1976	GBM	Primary	Proneural	3	NON G-CIMP	0	0.5	1	Wild-type	0	Methylated	1	65.2	1	Unspecified Radiation	0	1	Male	1	5.0484	0
TCGA.14.1827	GBM	Primary	Classical	1	NON G-CIMP	0	5.9	1	Wild-type	0	Methylated	1	51.5	0	Alkylating Chemo	1	0	Male	1	5.0504	0
TCGA.06.5408	GBM	Primary	Classical	1	NON G-CIMP	0	11.7	1	Wild-type	0	Unmethylated	0	54.9	0	Standard Radiation, TMZ Chemo	1	1	Female	0	5.054	0
TCGA.06.2557	GBM	Primary	Classical	1	NON G-CIMP	0	1.1	1	Wild-type	0	Unmethylated	0	76.6	1	Unspecified Radiation	0	1	Male	1	5.0541	0
TCGA.27.1834	GBM	Primary	Proneural	3	NON G-CIMP	0	40.5	1	Wild-type	0	Methylated	1	56.3	1	TMZ Chemoradiation, TMZ Chemo	1	1	Male	1	5.0831	0
TCGA.06.2558	GBM	Primary	Proneural	3	NON G-CIMP	0	12.5	1	Wild-type	0	Unmethylated	0	75.3	1	Standard Radiation	0	1	Female	0	5.106	0
TCGA.19.1786	GBM	Primary	Classical	1	NON G-CIMP	0	7.2	0	Wild-type	0	Unmethylated	0	64.5	1	Standard Radiation	0	1	Female	0	5.1305	0
TCGA.02.0034	GBM	Primary	Mesenchymal	2	NON G-CIMP	0	14.1	1	Wild-type	0	Unmethylated	0	60.7	1	Standard Radiation, TMZ Chemo	1	1	Male	1	5.1315	0
TCGA.14.0786	GBM	Primary	Classical	1	NON G-CIMP	0	23.1	1	Wild-type	0	Methylated	1	50.9	0	Standard Radiation, TMZ Chemo	1	1	Female	0	5.1647	0
TCGA.28.1747	GBM	Primary	Classical	1	NON G-CIMP	0	2.5	1	Wild-type	0	Methylated	1	44.6	0	Nonstandard Radiation, TMZ Chemo	1	1	Male	1	5.1662	0
TCGA.06.0126	GBM	Primary	Classical	1	NON G-CIMP	0	6.9	1	Wild-type	0	Unmethylated	0	86.6	1	Unspecified Radiation	0	1	Male	1	5.2095	0
TCGA.12.1602	GBM	Primary	Proneural	3	NON G-CIMP	0	6.8	1	Wild-type	0	Methylated	1	58.8	1	TMZ Chemoradiation, TMZ Chemo	1	1	Male	1	5.2148	0
TCGA.14.1451	GBM	Primary	Proneural	3	NON G-CIMP	0	23.1	1	Wild-type	0	Unmethylated	0	39.4	0	TMZ Chemoradiation, TMZ Chemo	1	1	Male	1	5.2201	0
TCGA.12.0821	GBM	Primary	Proneural	3	NON G-CIMP	0	10.6	1	Wild-type	0	Unmethylated	0	62.8	1	Standard Radiation, Alkylating Chemo	1	1	Male	1	5.2475	0
TCGA.19.5950	GBM	Primary	Classical	1	NON G-CIMP	0	17.2	1	Wild-type	0	Methylated	1	52.7	0	TMZ Chemoradiation, TMZ Chemo	1	1	Female	0	5.2724	0
TCGA.14.0817	GBM	Primary	Mesenchymal	2	NON G-CIMP	0	5.4	1	Wild-type	0	Unmethylated	0	69.6	1	Unspecified Radiation	0	1	Female	0	5.2873	0
TCGA.19.5960	GBM	Primary	Classical	1	NON G-CIMP	0	15	1	Wild-type	0	Unmethylated	0	56.5	1	TMZ Chemoradiation, TMZ Chemo	1	1	Male	1	5.2876	0
TCGA.06.6390	GBM	Primary	Classical	1	NON G-CIMP	0	5.4	1	Wild-type	0	Unmethylated	0	58.4	1	TMZ Chemoradiation, TMZ Chemo	1	1	Male	1	5.2881	0
TCGA.06.5411	GBM	Primary	Proneural	3	NON G-CIMP	0	8.3	1	Wild-type	0	Unmethylated	0	51.6	0	Standard Radiation, TMZ Chemo	1	1	Male	1	5.2882	0
TCGA.12.1597	GBM	Primary	Proneural	3	NON G-CIMP	0	22.2	1	Wild-type	0	Methylated	1	62.6	1	Standard Radiation, TMZ Chemo	1	1	Female	0	5.3004	0
TCGA.02.0074	GBM	Primary	Proneural	3	NON G-CIMP	0	10.2	1	Wild-type	0	Unmethylated	0	68.2	1	TMZ Chemoradiation, TMZ Chemo	1	1	Female	0	5.3263	0
TCGA.28.2514	GBM	Primary	Classical	1	NON G-CIMP	0	5.3	0	Wild-type	0	Unmethylated	0	45.8	0	Standard Radiation, TMZ Chemo	1	1	Male	1	5.3291	0
TCGA.06.2561	GBM	Primary	Classical	1	NON G-CIMP	0	17.6	1	Wild-type	0	Unmethylated	0	53.4	0	TMZ Chemoradiation, TMZ Chemo	1	1	Female	0	5.3354	0
TCGA.19.2625	GBM	Primary	Classical	1	NON G-CIMP	0	4.1	1	Wild-type	0	Unmethylated	0	76.5	1	Unspecified Radiation	0	1	Female	0	5.3473	0
TCGA.27.2523	GBM	Primary	Classical	1	NON G-CIMP	0	16.1	1	Wild-type	0	Methylated	1	63.1	1	Standard Radiation, TMZ Chemo	1	1	Male	1	5.3837	0
TCGA.27.2526	GBM	Primary	Classical	1	NON G-CIMP	0	2.9	1	Wild-type	0	Unmethylated	0	79.3	1	Unspecified Radiation	0	1	Female	0	5.4025	0
TCGA.19.2620	GBM	Primary	Classical	1	NON G-CIMP	0	4.9	1	Wild-type	0	Methylated	1	70.3	1	TMZ Chemoradiation, TMZ Chemo	1	1	Male	1	5.4211	0
TCGA.14.1794	GBM	Primary	Proneural	3	NON G-CIMP	0	1	1	Wild-type	0	Unmethylated	0	59.2	1	Nonstandard Radiation	0	1	Male	1	5.4375	0
TCGA.32.4211	GBM	Primary	Proneural	3	NON G-CIMP	0	12.6	1	Wild-type	0	Unmethylated	0	56.8	1	TMZ Chemoradiation, TMZ Chemo	1	1	Male	1	5.4453	0
TCGA.19.1390	GBM	Primary	Proneural	3	NON G-CIMP	0	25.4	1	Wild-type	0	Methylated	1	63.1	1	Unspecified Radiation	0	1	Female	0	5.4708	0
TCGA.32.1980	GBM	Primary	Proneural	3	NON G-CIMP	0	1.2	1	Wild-type	0	Unmethylated	0	72.5	1	Unspecified Radiation	0	1	Male	1	5.5034	0
TCGA.02.2486	GBM	Primary	Mesenchymal	2	NON G-CIMP	0	20.3	1	Wild-type	0	Unmethylated	0	64	1	TMZ Chemoradiation, TMZ Chemo	1	1	Male	1	5.5052	0
TCGA.26.5133	GBM	Primary	Proneural	3	G-CIMP	1	14.9	0	Wild-type	0	Unmethylated	0	59	1	TMZ Chemoradiation, TMZ Chemo	1	1	Male	1	5.541	0
TCGA.32.2615	GBM	Primary	Mesenchymal	2	NON G-CIMP	0	15.9	1	Wild-type	0	Unmethylated	0	62.7	1	Nonstandard Radiation, TMZ Chemo	1	1	Male	1	5.5552	0
TCGA.06.2563	GBM	Primary	Classical	1	NON G-CIMP	0	30.6	0	Wild-type	0	Methylated	1	72.9	1	TMZ Chemoradiation, TMZ Chemo	1	1	Female	0	5.5798	0
TCGA.26.5132	GBM	Primary	Classical	1	NON G-CIMP	0	9.4	0	Wild-type	0	Methylated	1	74.5	1	TMZ Chemoradiation, TMZ Chemo	1	1	Male	1	5.5875	0
TCGA.41.2572	GBM	Primary	Classical	1	NON G-CIMP	0	13.3	1	Wild-type	0	Unmethylated	0	67.1	1	TMZ Chemoradiation, TMZ Chemo	1	1	Male	1	5.6289	0
TCGA.12.0828	GBM	Primary	Classical	1	NON G-CIMP	0	8.9	1	Wild-type	0	Methylated	1	57.2	1	Standard Radiation, TMZ Chemo	1	1	Male	1	5.6667	0
TCGA.12.1088	GBM	Primary	Mesenchymal	2	NON G-CIMP	0	127.6	1	Wild-type	0	Unmethylated	0	53.9	0	Standard Radiation, Alkylating Chemo	1	1	Female	0	5.6865	0
TCGA.76.4932	GBM	Primary	Proneural	3	NON G-CIMP	0	47.9	1	Wild-type	0	Methylated	1	50.5	0	Standard Radiation, TMZ Chemo	1	1	Female	0	5.6995	0
TCGA.32.2634	GBM	Primary	Proneural	3	NON G-CIMP	0	22.8	0	Wild-type	0	Methylated	1	82	1	TMZ Chemoradiation, TMZ Chemo	1	1	Male	1	5.704	0
TCGA.28.5219	GBM	Primary	Classical	1	NON G-CIMP	0	22.7	0	Wild-type	0	Methylated	1	47.2	0	Nonstandard Radiation, TMZ Chemo	1	1	Female	0	5.7108	0
TCGA.41.3392	GBM	Primary	Classical	1	NON G-CIMP	0	1	1	Wild-type	0	Unmethylated	0	88.6	1	Unspecified Radiation	0	1	Male	1	5.7168	0
TCGA.19.5959	GBM	Primary	Classical	1	NON G-CIMP	0	16.8	1	Wild-type	0	Methylated	1	77.9	1	TMZ Chemoradiation, TMZ Chemo	1	1	Female	0	5.7535	0
TCGA.32.5222	GBM	Primary	Proneural	3	NON G-CIMP	0	19.2	1	Wild-type	0	Methylated	1	66.1	1	TMZ Chemoradiation, TMZ Chemo	1	1	Male	1	5.7595	0
TCGA.19.2623	GBM	Primary	Mesenchymal	2	NON G-CIMP	0	7.5	0	Wild-type	0	Methylated	1	65.3	1	TMZ Chemoradiation, TMZ Chemo	1	1	Male	1	5.8167	0
TCGA.14.0865	GBM	Primary	Proneural	3	NON G-CIMP	0	16.5	1	Wild-type	0	Methylated	1	67.9	1	TMZ Chemoradiation, TMZ Chemo	1	1	Male	1	5.8178	0
TCGA.06.5856	GBM	Primary	Classical	1	NON G-CIMP	0	3.8	1	Wild-type	0	Unmethylated	0	58.1	1	Unspecified Radiation	0	1	Male	1	5.8187	0
TCGA.28.1752	GBM	Primary	Classical	1	NON G-CIMP	0	8.5	0	Wild-type	0	Methylated	1	42.6	0	TMZ Chemoradiation, TMZ Chemo	1	1	Female	0	5.8326	0
TCGA.19.5951	GBM	Primary	Classical	1	NON G-CIMP	0	8	1	Wild-type	0	Unmethylated	0	76.7	1	TMZ Chemoradiation, TMZ Chemo	1	1	Female	0	5.8437	0
TCGA.12.3644	GBM	Primary	Proneural	3	NON G-CIMP	0	59.8	1	Wild-type	0	Methylated	1	47.8	0	TMZ Chemoradiation, TMZ Chemo	1	1	Female	0	5.8547	0
TCGA.27.1833	GBM	Primary	Classical	1	NON G-CIMP	0	24.2	1	Wild-type	0	Unmethylated	0	67.3	1	Standard Radiation, TMZ Chemo	1	1	Female	0	5.857	0
TCGA.14.1455	GBM	Primary	Proneural	3	NON G-CIMP	0	0.9	1	Wild-type	0	Methylated	1	61.8	1	Alkylating Chemo	1	0	Male	1	5.8799	0
TCGA.28.5220	GBM	Primary	Classical	1	NON G-CIMP	0	10.5	0	Wild-type	0	Unmethylated	0	67.4	1	Standard Radiation, TMZ Chemo	1	1	Male	1	5.885	0
TCGA.06.2564	GBM	Primary	Classical	1	NON G-CIMP	0	6	0	Wild-type	0	Unmethylated	0	50.5	0	Nonstandard Radiation, TMZ Chemo	1	1	Male	1	5.9104	0
TCGA.14.0871	GBM	Primary	Proneural	3	NON G-CIMP	0	28.9	1	Wild-type	0	Unmethylated	0	75	1	Standard Radiation	0	1	Female	0	5.914	0
TCGA.12.3650	GBM	Primary	Proneural	3	NON G-CIMP	0	10.9	1	Wild-type	0	Unmethylated	0	46.9	0	TMZ Chemoradiation, TMZ Chemo	1	1	Male	1	5.9145	0
TCGA.26.1439	GBM	Primary	Classical	1	NON G-CIMP	0	13.9	1	Wild-type	0	Unmethylated	0	63.8	1	TMZ Chemoradiation, TMZ Chemo	1	1	Male	1	5.9247	0
TCGA.06.2569	GBM	Primary	Mesenchymal	2	NON G-CIMP	0	0.4	0	Wild-type	0	Unmethylated	0	24.4	0	Unspecified Radiation	0	1	Female	0	5.9457	0
TCGA.06.0125	GBM	Primary	Classical	1	NON G-CIMP	0	47.6	1	Wild-type	0	Methylated	1	63.9	1	TMZ Chemoradiation, TMZ Chemo	1	1	Female	0	5.9587	0
TCGA.41.5651	GBM	Primary	Proneural	3	NON G-CIMP	0	15.1	1	Wild-type	0	Methylated	1	59.4	1	TMZ Chemoradiation, TMZ Chemo	1	1	Female	0	5.9697	0
TCGA.41.3915	GBM	Primary	Mesenchymal	2	NON G-CIMP	0	11.8	1	Wild-type	0	Methylated	1	49	0	TMZ Chemoradiation, TMZ Chemo	1	1	Male	1	5.9721	0
TCGA.76.4931	GBM	Primary	Classical	1	NON G-CIMP	0	9.2	1	Wild-type	0	Unmethylated	0	70.7	1	Nonstandard Radiation, TMZ Chemo	1	1	Female	0	5.9844	0
TCGA.02.0069	GBM	Primary	Proneural	3	NON G-CIMP	0	28.7	0	Wild-type	0	Methylated	1	31.9	0	TMZ Chemoradiation, TMZ Chemo	1	1	Female	0	5.9966	0
TCGA.06.5414	GBM	Primary	Classical	1	NON G-CIMP	0	9	0	Wild-type	0	Unmethylated	0	61.7	1	TMZ Chemoradiation, TMZ Chemo	1	1	Male	1	6.002	0
TCGA.19.1791	GBM	Primary	Classical	1	NON G-CIMP	0	0.1	0	Wild-type	0	Unmethylated	0	82.3	1	Unspecified Radiation	0	1	Female	0	6.0076	0
TCGA.15.1446	GBM	Primary	Classical	1	NON G-CIMP	0	19.1	0	Wild-type	0	Unmethylated	0	55.7	1	TMZ Chemoradiation, TMZ Chemo	1	1	Male	1	6.0152	0
TCGA.14.0812	GBM	Primary	Mesenchymal	2	NON G-CIMP	0	3.2	1	Wild-type	0	Methylated	1	65.9	1	Alkylating Chemo	1	0	Male	1	6.0237	0
TCGA.06.5415	GBM	Primary	Classical	1	NON G-CIMP	0	8.6	0	Wild-type	0	Unmethylated	0	60.8	1	TMZ Chemoradiation, TMZ Chemo	1	1	Male	1	6.0246	0
TCGA.06.0141	GBM	Primary	Mesenchymal	2	NON G-CIMP	0	10.3	1	Wild-type	0	Unmethylated	0	62.8	1	TMZ Chemoradiation, TMZ Chemo	1	1	Male	1	6.0258	0
TCGA.19.2631	GBM	Primary	Classical	1	NON G-CIMP	0	7	1	Wild-type	0	Methylated	1	74.5	1	Standard Radiation	0	1	Female	0	6.0417	0
TCGA.14.1396	GBM	Primary	Mesenchymal	2	NON G-CIMP	0	1.1	1	Wild-type	0	Methylated	1	78.7	1	Unspecified Radiation	0	1	Female	0	6.051	0
TCGA.02.0033	GBM	Primary	Mesenchymal	2	NON G-CIMP	0	2.8	1	Wild-type	0	Methylated	1	55	0	Standard Radiation	0	1	Male	1	6.0621	0
TCGA.27.1838	GBM	Primary	Classical	1	NON G-CIMP	0	11.5	1	Wild-type	0	Unmethylated	0	59.4	1	Standard Radiation, TMZ Chemo	1	1	Female	0	6.081	0
TCGA.19.0957	GBM	Primary	Proneural	3	NON G-CIMP	0	21.9	1	Wild-type	0	Unmethylated	0	48.5	0	TMZ Chemoradiation, TMZ Chemo	1	1	Female	0	6.0947	0
TCGA.76.6191	GBM	Primary	Proneural	3	NON G-CIMP	0	16.7	1	Wild-type	0	Unmethylated	0	57.3	1	TMZ Chemoradiation, TMZ Chemo	1	1	Male	1	6.1133	0
TCGA.28.5209	GBM	Primary	Mesenchymal	2	NON G-CIMP	0	2.5	0	Wild-type	0	Methylated	1	66.7	1	Nonstandard Radiation, TMZ Chemo	1	1	Female	0	6.118	0
TCGA.32.4719	GBM	Primary	Classical	1	NON G-CIMP	0	10.8	1	Wild-type	0	Unmethylated	0	73.1	1	TMZ Chemoradiation, TMZ Chemo	1	1	Male	1	6.1202	1
TCGA.19.2619	GBM	Primary	Classical	1	NON G-CIMP	0	9.7	0	Wild-type	0	Methylated	1	55.2	1	TMZ Chemoradiation, TMZ Chemo	1	1	Female	0	6.1782	1
TCGA.02.0115	GBM	Primary	Classical	1	NON G-CIMP	0	15.7	1	Wild-type	0	Methylated	1	52.7	0	TMZ Chemoradiation, TMZ Chemo	1	1	Male	1	6.1879	1
TCGA.19.1386	GBM	Primary	Classical	1	NON G-CIMP	0	9.1	1	Wild-type	0	Unmethylated	0	51.1	0	TMZ Chemoradiation, TMZ Chemo	1	1	Male	1	6.195	1
TCGA.28.5214	GBM	Primary	Mesenchymal	2	NON G-CIMP	0	23.4	1	Wild-type	0	Unmethylated	0	53.4	0	Nonstandard Radiation, TMZ Chemo	1	1	Male	1	6.2465	1
TCGA.02.0054	GBM	Primary	Mesenchymal	2	NON G-CIMP	0	6.5	1	Wild-type	0	Methylated	1	44.4	0	TMZ Chemoradiation, TMZ Chemo	1	1	Female	0	6.2469	1
TCGA.12.1093	GBM	Primary	Mesenchymal	2	NON G-CIMP	0	16	1	Wild-type	0	Unmethylated	0	66.5	1	TMZ Chemoradiation, TMZ Chemo	1	1	Female	0	6.2614	1
TCGA.12.3649	GBM	Primary	Classical	1	NON G-CIMP	0	15.2	1	Wild-type	0	Unmethylated	0	76.2	1	TMZ Chemo	1	0	Male	1	6.2645	1
TCGA.12.0820	GBM	Primary	Classical	1	NON G-CIMP	0	18.5	1	Wild-type	0	Unmethylated	0	40.7	0	Standard Radiation, TMZ Chemo	1	1	Male	1	6.2979	1
TCGA.06.5413	GBM	Primary	Mesenchymal	2	NON G-CIMP	0	8.8	0	Wild-type	0	Unmethylated	0	67	1	Standard Radiation, TMZ Chemo	1	1	Male	1	6.3029	1
TCGA.14.2554	GBM	Primary	Classical	1	NON G-CIMP	0	17.5	1	Wild-type	0	Unmethylated	0	52.3	0	Nonstandard Radiation	0	1	Female	0	6.308	1
TCGA.12.5301	GBM	Primary	Proneural	3	NON G-CIMP	0	2	1	Wild-type	0	Methylated	1	59.6	1	TMZ Chemoradiation, TMZ Chemo	1	1	Male	1	6.3325	1
TCGA.41.2571	GBM	Primary	Proneural	3	NON G-CIMP	0	0.8	1	Wild-type	0	Unmethylated	0	89.3	1	TMZ Chemo	1	0	Male	1	6.3703	1
TCGA.76.6285	GBM	Primary	Proneural	3	NON G-CIMP	0	8.3	1	Wild-type	0	Unmethylated	0	64.8	1	TMZ Chemo	1	0	Female	0	6.3738	1
TCGA.32.2638	GBM	Primary	Classical	1	NON G-CIMP	0	25.2	1	Wild-type	0	Methylated	1	67.5	1	TMZ Chemoradiation, TMZ Chemo	1	1	Male	1	6.4062	1
TCGA.41.3393	GBM	Primary	Mesenchymal	2	NON G-CIMP	0	4.4	1	Wild-type	0	Unmethylated	0	81.9	1	TMZ Chemoradiation, TMZ Chemo	1	1	Female	0	6.4157	1
TCGA.19.1789	GBM	Primary	Classical	1	NON G-CIMP	0	3.2	1	Wild-type	0	Methylated	1	69.2	1	Standard Radiation, TMZ Chemo	1	1	Female	0	6.4256	1
TCGA.27.1836	GBM	Primary	Proneural	3	NON G-CIMP	0	30.1	1	Wild-type	0	Methylated	1	33	0	TMZ Chemoradiation, TMZ Chemo	1	1	Female	0	6.4297	1
TCGA.06.6391	GBM	Primary	Proneural	3	NON G-CIMP	0	1.5	1	Wild-type	0	Methylated	1	44.4	0	Unspecified Radiation	0	1	Female	0	6.4354	1
TCGA.28.1750	GBM	Primary	Mesenchymal	2	NON G-CIMP	0	8.3	0	Wild-type	0	Unmethylated	0	40.6	0	TMZ Chemoradiation, TMZ Chemo	1	1	Female	0	6.4493	1
TCGA.27.1831	GBM	Primary	Classical	1	NON G-CIMP	0	16.6	1	Wild-type	0	Unmethylated	0	66.9	1	TMZ Chemoradiation, TMZ Chemo	1	1	Male	1	6.4712	1
TCGA.27.2518	GBM	Primary	Classical	1	NON G-CIMP	0	24.8	1	Wild-type	0	Unmethylated	0	52.4	0	TMZ Chemoradiation, TMZ Chemo	1	1	Male	1	6.4739	1
TCGA.19.2624	GBM	Primary	Proneural	3	NON G-CIMP	0	0.2	1	Wild-type	0	Unmethylated	0	51.7	0	Unspecified Radiation	0	1	Male	1	6.4857	1
TCGA.28.5208	GBM	Primary	Mesenchymal	2	NON G-CIMP	0	17.9	1	Wild-type	0	Methylated	1	52.2	0	TMZ Chemoradiation, TMZ Chemo	1	1	Male	1	6.4988	1
TCGA.12.1599	GBM	Primary	Classical	1	NON G-CIMP	0	25.7	1	Wild-type	0	Methylated	1	47.7	0	TMZ Chemoradiation, TMZ Chemo	1	1	Female	0	6.5245	1
TCGA.02.0027	GBM	Primary	Classical	1	NON G-CIMP	0	12.2	1	Wild-type	0	Methylated	1	33.9	0	TMZ Chemoradiation, TMZ Chemo	1	1	Female	0	6.5286	1
TCGA.02.0086	GBM	Primary	Mesenchymal	2	NON G-CIMP	0	8.8	1	Wild-type	0	Methylated	1	45.9	0	TMZ Chemoradiation, TMZ Chemo	1	1	Female	0	6.5317	1
TCGA.06.2566	GBM	Primary	Classical	1	NON G-CIMP	0	6	1	Wild-type	0	Unmethylated	0	23.1	0	TMZ Chemoradiation, TMZ Chemo	1	1	Female	0	6.5447	1
TCGA.14.1453	GBM	Primary	Classical	1	NON G-CIMP	0	1.1	1	Wild-type	0	Unmethylated	0	69.3	1	Unspecified Radiation	0	1	Male	1	6.5613	1
TCGA.32.1982	GBM	Primary	Classical	1	NON G-CIMP	0	4.7	1	Wild-type	0	Methylated	1	76	1	Alkylating Chemo	1	0	Female	0	6.5651	1
TCGA.28.2509	GBM	Primary	Mesenchymal	2	NON G-CIMP	0	4.8	0	Wild-type	0	Methylated	1	77.3	1	Standard Radiation, TMZ Chemo	1	1	Female	0	6.5748	1
TCGA.19.4068	GBM	Primary	Classical	1	NON G-CIMP	0	4.5	0	Wild-type	0	Unmethylated	0	68.3	1	TMZ Chemoradiation, TMZ Chemo	1	1	Female	0	6.608	1
TCGA.06.5418	GBM	Primary	Mesenchymal	2	NON G-CIMP	0	2.7	1	Wild-type	0	Unmethylated	0	75.5	1	Unspecified Radiation	0	1	Female	0	6.6323	1
TCGA.12.1092	GBM	Primary	Mesenchymal	2	NON G-CIMP	0	21.7	1	Wild-type	0	Methylated	1	58.6	1	TMZ Chemoradiation, TMZ Chemo	1	1	Male	1	6.6455	1
TCGA.28.5213	GBM	Primary	Mesenchymal	2	NON G-CIMP	0	31.3	0	Wild-type	0	Unmethylated	0	72.5	1	Standard Radiation, TMZ Chemo	1	1	Male	1	6.713	1
TCGA.02.2485	GBM	Primary	Classical	1	NON G-CIMP	0	15.4	0	Wild-type	0	Unmethylated	0	53.4	0	TMZ Chemoradiation, TMZ Chemo	1	1	Male	1	6.7216	1
TCGA.06.0879	GBM	Primary	Classical	1	NON G-CIMP	0	40.4	1	Wild-type	0	Methylated	1	52.4	0	Standard Radiation, TMZ Chemo	1	1	Male	1	6.7305	1
TCGA.06.0124	GBM	Primary	Mesenchymal	2	NON G-CIMP	0	20.4	1	Wild-type	0	Methylated	1	67.3	1	Unspecified Radiation, TMZ Chemo	1	1	Male	1	6.7366	1
TCGA.06.0145	GBM	Primary	Classical	1	NON G-CIMP	0	2.3	1	Wild-type	0	Methylated	1	53.8	0	Unspecified Radiation	0	1	Female	0	6.7664	1
TCGA.32.2495	GBM	Primary	Classical	1	NON G-CIMP	0	15	1	Wild-type	0	Unmethylated	0	59.9	1	TMZ Chemoradiation, TMZ Chemo	1	1	Female	0	6.768	1
TCGA.27.1837	GBM	Primary	Classical	1	NON G-CIMP	0	14	1	Wild-type	0	Methylated	1	36.6	0	Standard Radiation, TMZ Chemo	1	1	Male	1	6.7756	1
TCGA.02.0046	GBM	Primary	Proneural	3	NON G-CIMP	0	6.9	1	Wild-type	0	Methylated	1	61.4	1	Standard Radiation	0	1	Male	1	6.7942	1
TCGA.26.5134	GBM	Primary	Proneural	3	NON G-CIMP	0	5.5	0	Wild-type	0	Unmethylated	0	74.2	1	Standard Radiation	0	1	Male	1	6.8265	1
TCGA.06.1087	GBM	Primary	Proneural	3	NON G-CIMP	0	4	1	Wild-type	0	Unmethylated	0	75.7	1	TMZ Chemoradiation, TMZ Chemo	1	1	Male	1	6.8284	1
TCGA.27.2521	GBM	Primary	Proneural	3	G-CIMP	1	10.4	0	Mutant	1	Methylated	1	34.7	0	Standard Radiation, TMZ Chemo	1	1	Male	1	6.8372	1
TCGA.16.0861	GBM	Primary	Classical	1	NON G-CIMP	0	4.3	0	Wild-type	0	Unmethylated	0	65.1	1	Standard Radiation	0	1	Male	1	6.8568	1
TCGA.28.1753	GBM	Primary	Mesenchymal	2	NON G-CIMP	0	1.2	0	Wild-type	0	Unmethylated	0	53	0	Nonstandard Radiation	0	1	Male	1	6.858	1
TCGA.14.1795	GBM	Primary	Mesenchymal	2	NON G-CIMP	0	2	1	Wild-type	0	Methylated	1	66.7	1	Alkylating Chemo	1	0	Male	1	6.8761	1
TCGA.28.1749	GBM	Primary	Classical	1	NON G-CIMP	0	9.2	0	Wild-type	0	Unmethylated	0	73.3	1	TMZ Chemoradiation, TMZ Chemo	1	1	Male	1	6.9031	1
TCGA.12.3652	GBM	Primary	Classical	1	NON G-CIMP	0	34.9	1	Wild-type	0	Unmethylated	0	60	1	TMZ Chemoradiation, TMZ Chemo	1	1	Male	1	6.9039	1
TCGA.02.0071	GBM	Primary	Classical	1	NON G-CIMP	0	5.5	1	Wild-type	0	Unmethylated	0	53.2	0	Unspecified Radiation	0	1	Male	1	6.9056	1
TCGA.76.6192	GBM	Primary	Proneural	3	NON G-CIMP	0	3.3	1	Wild-type	0	Unmethylated	0	74.8	1	Standard Radiation, TMZ Chemo	1	1	Male	1	6.9099	1
TCGA.02.0060	GBM	Primary	Proneural	3	NON G-CIMP	0	6	1	Wild-type	0	Methylated	1	66.1	1	TMZ Chemoradiation, TMZ Chemo	1	1	Female	0	6.9498	1
TCGA.76.4926	GBM	Primary	Mesenchymal	2	NON G-CIMP	0	4.5	1	Wild-type	0	Unmethylated	0	68.7	1	Nonstandard Radiation, TMZ Chemo	1	1	Male	1	6.9674	1
TCGA.02.0009	GBM	Primary	Classical	1	NON G-CIMP	0	10.6	1	Wild-type	0	Methylated	1	61.5	1	Nonstandard Radiation	0	1	Female	0	7.0208	1
TCGA.26.5135	GBM	Primary	Proneural	3	NON G-CIMP	0	8.9	1	Wild-type	0	Methylated	1	72.5	1	Unspecified Radiation	0	1	Female	0	7.0248	1
TCGA.76.4935	GBM	Primary	Proneural	3	NON G-CIMP	0	36.9	1	Wild-type	0	Methylated	1	52.6	0	Standard Radiation, TMZ Chemo	1	1	Female	0	7.0334	1
TCGA.06.0139	GBM	Primary	Mesenchymal	2	NON G-CIMP	0	11.9	1	Wild-type	0	Unmethylated	0	40.3	0	Standard Radiation, TMZ Chemo	1	1	Male	1	7.0445	1
TCGA.28.2513	GBM	Primary	Mesenchymal	2	NON G-CIMP	0	7.3	0	Wild-type	0	Unmethylated	0	69.6	1	TMZ Chemoradiation, TMZ Chemo	1	1	Female	0	7.0448	1
TCGA.06.1084	GBM	Primary	Mesenchymal	2	NON G-CIMP	0	23.9	1	Wild-type	0	Methylated	1	54.5	0	Standard Radiation, TMZ Chemo	1	1	Male	1	7.0481	1
TCGA.27.1830	GBM	Primary	Mesenchymal	2	NON G-CIMP	0	5.1	1	Wild-type	0	Methylated	1	57.9	1	Standard Radiation, TMZ Chemo	1	1	Male	1	7.0517	1
TCGA.76.4928	GBM	Primary	Classical	1	NON G-CIMP	0	3.1	1	Wild-type	0	Methylated	1	85.6	1	Nonstandard Radiation, TMZ Chemo	1	1	Female	0	7.0533	1
TCGA.06.2565	GBM	Primary	Classical	1	NON G-CIMP	0	16.6	1	Wild-type	0	Methylated	1	59	1	TMZ Chemoradiation, TMZ Chemo	1	1	Male	1	7.0542	1
TCGA.14.0813	GBM	Primary	Proneural	3	NON G-CIMP	0	1.4	1	Wild-type	0	Methylated	1	78.2	1	Unspecified Radiation	0	1	Male	1	7.0626	1
TCGA.27.2528	GBM	Primary	Classical	1	NON G-CIMP	0	15.8	1	Wild-type	0	Methylated	1	62.6	1	TMZ Chemoradiation, TMZ Chemo	1	1	Male	1	7.081	1
TCGA.12.5299	GBM	Primary	Classical	1	NON G-CIMP	0	3.2	1	Wild-type	0	Unmethylated	0	56	1	TMZ Chemoradiation, TMZ Chemo	1	1	Female	0	7.082	1
TCGA.19.1389	GBM	Primary	Mesenchymal	2	NON G-CIMP	0	4.6	1	Wild-type	0	Unmethylated	0	51.1	0	TMZ Chemoradiation, TMZ Chemo	1	1	Male	1	7.087	1
TCGA.76.6282	GBM	Primary	Mesenchymal	2	NON G-CIMP	0	17.1	1	Wild-type	0	Unmethylated	0	63.9	1	TMZ Chemoradiation, TMZ Chemo	1	1	Male	1	7.1287	1
TCGA.06.5410	GBM	Primary	Mesenchymal	2	NON G-CIMP	0	3.5	1	Wild-type	0	Methylated	1	72.3	1	Unspecified Radiation	0	1	Female	0	7.1504	1
TCGA.14.1037	GBM	Primary	Mesenchymal	2	NON G-CIMP	0	19.3	1	Wild-type	0	Unmethylated	0	66.9	1	Standard Radiation, TMZ Chemo	1	1	Female	0	7.1583	1
TCGA.19.5954	GBM	Primary	Classical	1	NON G-CIMP	0	12.1	1	Wild-type	0	Methylated	1	72.2	1	TMZ Chemoradiation, TMZ Chemo	1	1	Female	0	7.1606	1
TCGA.06.0169	GBM	Primary	Mesenchymal	2	NON G-CIMP	0	3.3	1	Wild-type	0	Unmethylated	0	68.8	1	TMZ Chemoradiation, TMZ Chemo	1	1	Male	1	7.1798	1
TCGA.06.5858	GBM	Primary	Classical	1	NON G-CIMP	0	6.2	0	Wild-type	0	Methylated	1	45.6	0	TMZ Chemoradiation, TMZ Chemo	1	1	Female	0	7.2205	1
TCGA.19.5958	GBM	Primary	Classical	1	NON G-CIMP	0	14.1	1	Wild-type	0	Unmethylated	0	56	1	TMZ Chemoradiation, TMZ Chemo	1	1	Male	1	7.2221	1
TCGA.06.0155	GBM	Primary	Mesenchymal	2	NON G-CIMP	0	10.4	1	Wild-type	0	Unmethylated	0	61.6	1	Standard Radiation, Alkylating Chemo	1	1	Male	1	7.2529	1
TCGA.06.0878	GBM	Primary	Mesenchymal	2	NON G-CIMP	0	7.2	0	Wild-type	0	Unmethylated	0	74.8	1	TMZ Chemoradiation, TMZ Chemo	1	1	Male	1	7.2614	1
TCGA.06.0122	GBM	Primary	Mesenchymal	2	NON G-CIMP	0	6.2	1	Wild-type	0	Unmethylated	0	84.8	1	Unspecified Radiation	0	1	Female	0	7.2679	1
TCGA.06.0876	GBM	Primary	Proneural	3	NON G-CIMP	0	46.2	0	Wild-type	0	Methylated	1	72.2	1	Standard Radiation, TMZ Chemo	1	1	Female	0	7.2782	1
TCGA.28.5216	GBM	Primary	Mesenchymal	2	NON G-CIMP	0	13.6	0	Wild-type	0	Unmethylated	0	52.7	0	TMZ Chemoradiation, TMZ Chemo	1	1	Male	1	7.285	1
TCGA.06.0147	GBM	Primary	Mesenchymal	2	NON G-CIMP	0	17.8	1	Wild-type	0	Methylated	1	51.3	0	Standard Radiation, TMZ Chemo	1	1	Female	0	7.3124	1
TCGA.27.2527	GBM	Primary	Mesenchymal	2	NON G-CIMP	0	14.4	1	Wild-type	0	Methylated	1	81.1	1	Nonstandard Radiation	0	1	Male	1	7.3366	1
TCGA.28.1755	GBM	Primary	Classical	1	NON G-CIMP	0	1.6	1	Wild-type	0	Unmethylated	0	52.7	0	TMZ Chemoradiation, TMZ Chemo	1	1	Female	0	7.3685	1
TCGA.19.5955	GBM	Primary	Mesenchymal	2	NON G-CIMP	0	1.8	1	Wild-type	0	Methylated	1	83.6	1	Unspecified Radiation	0	1	Male	1	7.3964	1
TCGA.28.1751	GBM	Primary	Mesenchymal	2	NON G-CIMP	0	7.6	0	Wild-type	0	Unmethylated	0	61	1	TMZ Chemoradiation, TMZ Chemo	1	1	Female	0	7.5158	1
TCGA.14.1034	GBM	Primary	Classical	1	NON G-CIMP	0	15.9	1	Wild-type	0	Methylated	1	60.3	1	Standard Radiation, Alkylating Chemo	1	1	Female	0	7.5789	1
TCGA.14.0867	GBM	Primary	Mesenchymal	2	NON G-CIMP	0	2	1	Wild-type	0	Methylated	1	67.9	1	Unspecified Radiation	0	1	Male	1	7.5803	1
TCGA.28.6450	GBM	Primary	Classical	1	NON G-CIMP	0	5.4	1	Wild-type	0	Unmethylated	0	60.7	1	TMZ Chemoradiation, TMZ Chemo	1	1	Male	1	7.5884	1
TCGA.12.0829	GBM	Primary	Mesenchymal	2	NON G-CIMP	0	20.6	1	Wild-type	0	Methylated	1	75.2	1	TMZ Chemoradiation, TMZ Chemo	1	1	Male	1	7.6147	1
TCGA.06.0148	GBM	Primary	Classical	1	NON G-CIMP	0	10.1	1	Wild-type	0	Unmethylated	0	76.2	1	Standard Radiation	0	1	Male	1	7.6164	1
TCGA.27.2524	GBM	Primary	Mesenchymal	2	NON G-CIMP	0	7.6	1	Wild-type	0	Unmethylated	0	56.3	1	Standard Radiation, TMZ Chemo	1	1	Male	1	7.6656	1
TCGA.06.0137	GBM	Primary	Classical	1	NON G-CIMP	0	26.7	1	Wild-type	0	Unmethylated	0	63.7	1	Standard Radiation, Alkylating Chemo	1	1	Female	0	7.6911	1
TCGA.12.0822	GBM	Primary	Mesenchymal	2	NON G-CIMP	0	23.5	1	Wild-type	0	Methylated	1	46	0	Standard Radiation, TMZ Chemo	1	1	Male	1	7.7376	1
TCGA.32.1986	GBM	Primary	Mesenchymal	2	NON G-CIMP	0	12.7	1	Wild-type	0	Unmethylated	0	68.6	1	Standard Radiation, TMZ Chemo	1	1	Male	1	7.7417	1
TCGA.14.0787	GBM	Primary	Classical	1	NON G-CIMP	0	2.2	1	Wild-type	0	Methylated	1	69.3	1	Unspecified Radiation	0	1	Male	1	7.7677	1
TCGA.02.0052	GBM	Primary	Proneural	3	NON G-CIMP	0	12.6	1	Wild-type	0	Unmethylated	0	49.5	0	TMZ Chemoradiation, TMZ Chemo	1	1	Male	1	7.7729	1
TCGA.06.0881	GBM	Primary	Mesenchymal	2	NON G-CIMP	0	16.6	1	Wild-type	0	Unmethylated	0	50	0	Standard Radiation, TMZ Chemo	1	1	Male	1	7.7803	1
TCGA.14.0790	GBM	Primary	Classical	1	NON G-CIMP	0	13.8	1	Wild-type	0	Methylated	1	64.8	1	TMZ Chemoradiation, TMZ Chemo	1	1	Female	0	7.8049	1
TCGA.06.0877	GBM	Primary	Classical	1	NON G-CIMP	0	5.7	1	Wild-type	0	Methylated	1	78.7	1	Nonstandard Radiation	0	1	Male	1	7.8054	1
TCGA.06.0143	GBM	Primary	Mesenchymal	2	NON G-CIMP	0	11.7	1	Wild-type	0	Unmethylated	0	58.5	1	Standard Radiation, TMZ Chemo	1	1	Male	1	7.8285	1
TCGA.32.2494	GBM	Primary	Mesenchymal	2	NON G-CIMP	0	20.8	1	Wild-type	0	Methylated	1	58	1	TMZ Chemoradiation, TMZ Chemo	1	1	Female	0	7.8657	1
TCGA.06.0650	GBM	Primary	Mesenchymal	2	NON G-CIMP	0	23.6	1	Wild-type	0	Unmethylated	0	39.9	0	TMZ Chemoradiation, TMZ Chemo	1	1	Female	0	7.8767	1
TCGA.28.1760	GBM	Primary	Mesenchymal	2	NON G-CIMP	0	4.7	0	Wild-type	0	Unmethylated	0	48.6	0	Standard Radiation, TMZ Chemo	1	1	Male	1	7.8853	1
TCGA.19.1790	GBM	Primary	Mesenchymal	2	NON G-CIMP	0	5.1	1	Wild-type	0	Unmethylated	0	56.5	1	TMZ Chemoradiation, TMZ Chemo	1	1	Male	1	7.8879	1
TCGA.19.5952	GBM	Primary	Classical	1	NON G-CIMP	0	18.9	1	Wild-type	0	Unmethylated	0	62.5	1	Nonstandard Radiation	0	1	Male	1	7.901	1
TCGA.28.5204	GBM	Primary	Proneural	3	NON G-CIMP	0	14.9	1	Wild-type	0	Unmethylated	0	72.5	1	TMZ Chemoradiation, TMZ Chemo	1	1	Male	1	7.921	1
TCGA.41.4097	GBM	Primary	Mesenchymal	2	NON G-CIMP	0	0.2	1	Wild-type	0	Unmethylated	0	63.3	1	Unspecified Radiation	0	1	Female	0	7.9531	1
TCGA.28.5218	GBM	Primary	Mesenchymal	2	NON G-CIMP	0	5.2	1	Wild-type	0	Unmethylated	0	63.2	1	Standard Radiation, TMZ Chemo	1	1	Male	1	7.9535	1
TCGA.02.0064	GBM	Primary	Mesenchymal	2	NON G-CIMP	0	19.7	1	Wild-type	0	Methylated	1	50	0	TMZ Chemoradiation, TMZ Chemo	1	1	Male	1	7.9639	1
TCGA.02.0075	GBM	Primary	Mesenchymal	2	NON G-CIMP	0	20.8	1	Wild-type	0	Methylated	1	63.5	1	TMZ Chemoradiation, TMZ Chemo	1	1	Male	1	7.9948	1
TCGA.32.4213	GBM	Primary	Mesenchymal	2	NON G-CIMP	0	19.9	0	Wild-type	0	Methylated	1	47.2	0	TMZ Chemoradiation, TMZ Chemo	1	1	Female	0	8.1142	1
TCGA.81.5910	GBM	Primary	Classical	1	NON G-CIMP	0	1.6	1	Wild-type	0	Unmethylated	0	64.5	1	Unspecified Radiation	0	1	Male	1	8.1203	1
TCGA.02.0085	GBM	Primary	Mesenchymal	2	NON G-CIMP	0	51.3	1	Wild-type	0	Methylated	1	63.8	1	TMZ Chemoradiation, TMZ Chemo	1	1	Female	0	8.1815	1
TCGA.26.5139	GBM	Primary	Mesenchymal	2	NON G-CIMP	0	1.6	0	Wild-type	0	Unmethylated	0	65.1	1	Unspecified Radiation	0	1	Female	0	8.2067	1
TCGA.06.1800	GBM	Primary	Mesenchymal	2	NON G-CIMP	0	26.8	1	Wild-type	0	Methylated	1	61.1	1	Standard Radiation, TMZ Chemo	1	1	Male	1	8.2437	1
TCGA.32.1991	GBM	Primary	Classical	1	NON G-CIMP	0	16.9	1	Wild-type	0	Unmethylated	0	60.3	1	TMZ Chemoradiation, TMZ Chemo	1	1	Male	1	8.2456	1
TCGA.06.5412	GBM	Primary	Mesenchymal	2	NON G-CIMP	0	4.5	1	Wild-type	0	Methylated	1	78.8	1	Standard Radiation, TMZ Chemo	1	1	Female	0	8.2734	1
TCGA.19.2621	GBM	Primary	Classical	1	NON G-CIMP	0	1.1	1	Wild-type	0	Methylated	1	83.3	1	Unspecified Radiation	0	1	Male	1	8.3284	1
TCGA.02.0003	GBM	Primary	Proneural	3	NON G-CIMP	0	4.7	1	Wild-type	0	Unmethylated	0	50.2	0	Standard Radiation	0	1	Male	1	8.3453	1
TCGA.06.0882	GBM	Primary	Classical	1	NON G-CIMP	0	20.8	1	Wild-type	0	Unmethylated	0	30.4	0	TMZ Chemoradiation, TMZ Chemo	1	1	Male	1	8.3664	1
TCGA.14.0789	GBM	Primary	Mesenchymal	2	NON G-CIMP	0	11.2	1	Wild-type	0	Methylated	1	54.9	0	TMZ Chemoradiation, TMZ Chemo	1	1	Male	1	8.3666	1
TCGA.06.2562	GBM	Primary	Mesenchymal	2	NON G-CIMP	0	12.6	1	Wild-type	0	Unmethylated	0	81.5	1	Nonstandard Radiation, TMZ Chemo	1	1	Male	1	8.3794	1
TCGA.32.2491	GBM	Primary	Mesenchymal	2	NON G-CIMP	0	12.2	1	Wild-type	0	Unmethylated	0	63.3	1	TMZ Chemoradiation, TMZ Chemo	1	1	Male	1	8.4587	1
TCGA.19.1385	GBM	Primary	Mesenchymal	2	NON G-CIMP	0	10.8	1	Wild-type	0	Methylated	1	69.7	1	TMZ Chemoradiation, TMZ Chemo	1	1	Male	1	8.4717	1
TCGA.28.5215	GBM	Primary	Mesenchymal	2	NON G-CIMP	0	11	1	Wild-type	0	Methylated	1	62.1	1	Nonstandard Radiation, TMZ Chemo	1	1	Female	0	8.5257	1
TCGA.76.6193	GBM	Primary	Mesenchymal	2	NON G-CIMP	0	2.7	1	Wild-type	0	Unmethylated	0	78.7	1	Standard Radiation, TMZ Chemo	1	1	Male	1	8.5494	1
TCGA.06.2559	GBM	Primary	Proneural	3	NON G-CIMP	0	4.9	1	Wild-type	0	Methylated	1	83.7	1	TMZ Chemoradiation, TMZ Chemo	1	1	Male	1	8.5789	1
TCGA.28.2502	GBM	Primary	Mesenchymal	2	NON G-CIMP	0	0.7	0	Wild-type	0	Unmethylated	0	65.2	1	Nonstandard Radiation	0	1	Male	1	8.7299	1
TCGA.02.2470	GBM	Primary	Mesenchymal	2	NON G-CIMP	0	12.9	1	Wild-type	0	Unmethylated	0	57.5	1	TMZ Chemoradiation, TMZ Chemo	1	1	Male	1	8.7923	1
TCGA.27.1832	GBM	Primary	Mesenchymal	2	NON G-CIMP	0	9.9	1	Wild-type	0	Unmethylated	0	59.4	1	Nonstandard Radiation, TMZ Chemo	1	1	Female	0	8.9296	1
TCGA.14.0781	GBM	Primary	Mesenchymal	2	NON G-CIMP	0	1	1	Wild-type	0	Unmethylated	0	49	0	Unspecified Radiation	0	1	Male	1	9.0692	1
TCGA.19.5947	GBM	Primary	Mesenchymal	2	NON G-CIMP	0	6.6	1	Wild-type	0	Unmethylated	0	47.1	0	Nonstandard Radiation	0	1	Female	0	9.5139	1
TCGA.06.0130	GBM	Primary	Mesenchymal	2	NON G-CIMP	0	12.9	1	Wild-type	0	Unmethylated	0	54.2	0	TMZ Chemoradiation, TMZ Chemo	1	1	Male	1	10.2796	1
TCGA.26.5136	GBM	Primary	Mesenchymal	2	NON G-CIMP	0	19	1	Wild-type	0	Methylated	1	78	1	Unspecified Radiation	0	1	Female	0	10.6951	1
